# Supplementary material for: GARFIELD-AF model for prediction of stroke and major bleeding in atrial fibrillation: a Danish nationwide validation study
Source: PubMed Central journal article supplement — BMJ Open. 2019 Nov 11;9(11):e033283. doi: 10.1136/bmjopen-2019-033283 (PMC6858250; doi:10.1136/bmjopen-2019-033283), 2019-11-11
Supplement: bmjopen-2019-033283.draft_revisions.pdf [file bmjopen-2019-033283.draft_revisions.pdf]

# BMJ Open

BMJ Open is committed to open peer review. As part of this commitment we make the peer review history of every article we publish publicly available.

When an article is published we post the peer reviewers' comments and the authors' responses online. We also post the versions of the paper that were used during peer review. These are the versions that the peer review comments apply to.

The versions of the paper that follow are the versions that were submitted during the peer review process. They are not the versions of record or the final published versions. They should not be cited or distributed as the published version of this manuscript.

BMJ Open is an open access journal and the full, final, typeset and author-corrected version of record of the manuscript is available on our site with no access controls, subscription charges or pay-per-view fees (<http://bmjopen.bmj.com>).

If you have any questions on BMJ Open's open peer review process please email [info.bmjopen@bmj.com](mailto:info.bmjopen@bmj.com)

# BMJ Open

## GARFIELD-AF Model for Prediction of Stroke and Major Bleeding in Atrial Fibrillation: A Danish Nationwide Validation Study

|                               |                                                                                                                                                                                                                                                                                                                                                                                                                                                                                                                                                                                                                                                                                                                                                                                                                                                                |
|-------------------------------|----------------------------------------------------------------------------------------------------------------------------------------------------------------------------------------------------------------------------------------------------------------------------------------------------------------------------------------------------------------------------------------------------------------------------------------------------------------------------------------------------------------------------------------------------------------------------------------------------------------------------------------------------------------------------------------------------------------------------------------------------------------------------------------------------------------------------------------------------------------|
| Journal:                      | <i>BMJ Open</i>                                                                                                                                                                                                                                                                                                                                                                                                                                                                                                                                                                                                                                                                                                                                                                                                                                                |
| Manuscript ID                 | bmjopen-2019-033283                                                                                                                                                                                                                                                                                                                                                                                                                                                                                                                                                                                                                                                                                                                                                                                                                                            |
| Article Type:                 | Research                                                                                                                                                                                                                                                                                                                                                                                                                                                                                                                                                                                                                                                                                                                                                                                                                                                       |
| Date Submitted by the Author: | 08-Aug-2019                                                                                                                                                                                                                                                                                                                                                                                                                                                                                                                                                                                                                                                                                                                                                                                                                                                    |
| Complete List of Authors:     | Dalgaard, Frederik; Gentofte Hospital, Cardiology;<br>Pieper, Karen; Thrombosis Research Institute<br>Verheugt, Freek; Onze Lieve Vrouwe Gasthuis<br>Camm, John; University of London St George's Molecular and Clinical Sciences Research Institute<br>Fox, Keith; University of Edinburgh and Royal Infirmary of Edinburgh, Cardiology<br>Kakkar, Ajay ; Thrombosis Research Institute<br>Pallisgaard, Jannik; Bispebjerg Hospital<br>Rasmussen, Peter; Gentofte Hospital, Cardiology<br>Weert, Henk; AMC, General practice<br>Lindhardt, Tommi; Gentofte Hospital, Cardiology<br>Torp-Pedersen, Christian; Nordsjællands Hospital, Department of Clinical Investigation and Cardiology<br>Gislason, Gunnar; Gentofte Hospital, Cardiology<br>Ruwald, Martin; Gentofte Hospital, Cardiology<br>Harskamp, Ralf; Academic Medical Center Amsterdam, cardiology |
| Keywords:                     | Stroke < NEUROLOGY, CARDIOLOGY, Pacing & electrophysiology < CARDIOLOGY                                                                                                                                                                                                                                                                                                                                                                                                                                                                                                                                                                                                                                                                                                                                                                                        |
|                               |                                                                                                                                                                                                                                                                                                                                                                                                                                                                                                                                                                                                                                                                                                                                                                                                                                                                |

SCHOLARONE™  
Manuscripts

# GARFIELD-AF Model for Prediction of Stroke and Major Bleeding in Atrial Fibrillation: A Danish Nationwide Validation Study

Frederik Dalgaard, MD [1,2], Karen S. Pieper, MS [2,3], Freek W.A. Verheugt, MD, PhD [4], A. John Camm, MD, QHP, BSc [5] Keith AA Fox, MB, ChB [6], Ajay K. Kakkar, BSc, MBBS, PhD, FRCS [3,7], Jannik L. Pallisgaard, MD, PhD [8], Peter Vibe Rasmussen, MD [1], Henk van Weert [9] Tommi Bo Lindhardt, MD, PhD [1], Christian Torp-Pedersen, MD, DMSc, [1,10] Gunnar Gislason, MD, PhD [1,11,12], Martin H. Ruwald, MD, PhD [1], Ralf E. Harskamp, MD, PhD [9]

[1] Department of Cardiology, Herlev and Gentofte Hospital, Hellerup, Denmark

[2] Duke Clinical Research Institute, Durham NC, USA

[3] Thrombosis Research Institute, London, UK

[4] Onze Lieve Vrouwe Gasthuis (OLVG), Amsterdam, The Netherlands

[5] St. George's University of London, London, UK

[6] University of Edinburgh, United Kingdom

[7] University College London, United Kingdom

[8] Copenhagen University Hospital Bispebjerg, Denmark

[9] Amsterdam University Medical Center – AMC, Amsterdam, The Netherlands

[10] Department of Clinical Investigation and Cardiology, Nordsjaelland Hospital, Hillerød, Denmark

[11] The Danish Heart Foundation, Copenhagen, Denmark

[12] The National Institute of Public Health, University of Southern Denmark, Copenhagen, Denmark

Corresponding author:

Frederik Dalgaard

Department of Cardiology, Copenhagen University Hospital Herlev and Gentofte

Kildegaardsvej 28, 2900 Hellerup, Denmark

Telephone: 0045 38673867, Fax number: 0045 70201283

E-mail: frederik.dalgaard@regionh.dk

Twitter: @F\_dalgaard

Word count:

3,017

For peer review only

1  
2  
3  
4  
5  
6  
7  
8  
9  
10  
11  
12  
13  
14  
15  
16  
17  
18  
19  
20  
21  
22  
23  
24  
25  
26  
27  
28  
29  
30  
31  
32  
33  
34  
35  
36  
37  
38  
39  
40  
41  
42  
43  
44  
45  
46  
47  
48  
49  
50  
51  
52  
53  
54  
55  
56  
57  
58  
59  
60

## Abstract

**Objectives:** To externally validate the accuracy of the GARFIELD-AF model against existing risk scores for stroke and major bleeding risk in patients with non-valvular atrial fibrillation (AF) in a population-based cohort.

**Design:** Retrospective cohort study.

**Setting:** Danish nationwide registries.

**Participants:** 90,693 patients with newly diagnosed non-valvular AF were included between 2010 and 2016, with follow-up censored at 1-year.

**Primary and secondary outcome measures:** External validation was performed using discrimination and calibration plots. C-statistics were compared with CHA<sub>2</sub>DS<sub>2</sub>VASc for ischemic stroke/systemic embolism (SE) and HAS-BLED for major bleeding/hemorrhagic stroke outcomes.

**Results:** Of the 90,693 included, 51,180 patients received oral anticoagulants (OAC). Overall median age (Q1, Q3) were 75 (66-83) years and 48,486 (53.5%) were male. At 1-year follow-up, a total of 2,094 (2.3%) strokes/SE, 2,642 (2.9%) major bleedings and 10,915 (12.0%) deaths occurred. The GARFIELD-AF model was well calibrated with the predicted risk for stroke/SE and major bleeding. The discriminatory value of GARFIELD-AF risk model was superior to CHA<sub>2</sub>DS<sub>2</sub>VASc for predicting stroke in the overall cohort (C-index:0.71,95%-confidence interval (CI):0.70-0.72 versus C-index:0.67,95%-CI:0.66-0.68, p<0.001) as well as in low-risk patients (C-index:0.64,95%-CI:0.59-0.69 versus C-index:0.57,95%-CI:0.53-0.61, p=0.007). The GARFIELD-AF model was comparable to HAS-BLED in predicting the risk of major bleeding in patients on OAC therapy (C-index:0.64,95%-CI:0.63-0.66 versus C-index:0.64,95%-CI: 0.63-0.65, p=0.60).

**Conclusion:** In a nationwide Danish cohort with non-valvular AF, the GARFIELD-AF model adequately predicted the risk of ischemic stroke/SE and major bleeding. Our external validation confirms that the

1  
2  
3 GARFIELD-AF model was superior to CHA<sub>2</sub>DS<sub>2</sub>VASc in predicting stroke/SE and comparable with  
4  
5 HAS-BLED for predicting major bleeding.  
6  
7

#### 8 9 **Strengths and limitations of this study**

- 10 • This validation study was able to compare prediction performance GARFIELD-AF model  
11 versus CHA<sub>2</sub>DS<sub>2</sub>VASc for stroke and HAS-BLED for major bleeding in patients with atrial  
12 fibrillation.  
13  
14
- 15 • This study used a large contemporary population-based cohort with atrial fibrillation with many  
16 events and very limited loss to follow-up.  
17  
18
- 19 • The validation was based on ICD-10 coding from the Danish registries which is prone to  
20 misclassification bias and lacked clinical measurements.  
21  
22  
23  
24  
25  
26  
27  
28  
29  
30  
31  
32  
33  
34  
35  
36  
37  
38  
39  
40  
41  
42  
43  
44  
45  
46  
47  
48  
49  
50  
51  
52  
53  
54  
55  
56  
57  
58  
59  
60

## INTRODUCTION

Atrial fibrillation (AF) is a common cardiac arrhythmia with a lifetime prevalence of 20-30% and is the cause of one in four strokes. [1] AF is associated with an increased risk of several cardiovascular conditions, most notably a nearly 5-fold increased stroke risk. [2, 3] The risk of stroke can be substantially diminished by thrombotic prophylaxis. [4, 5] However, 20-40% of potentially eligible patients do not receiving oral anticoagulant (OAC) therapy. [6-8] The most important and modifiable contributing factor is inappropriate risk assessment, with underutilization of existing risk scores, resulting in overestimation of bleeding risks and underestimation of potential stroke risk. [9, 10] Recently, the Global Anticoagulant Registry in the FIELD –Atrial Fibrillation (GARFIELD-AF) model was developed that allowed for simultaneous calculation of death, stroke, and bleeding risks in an international prospective registry of patients with newly diagnosed AF. [11] In the GARFIELD-AF and ORBIT-AF registries, the GARFIELD-AF model was found to improve discrimination of the existing risk scores for stroke (CHA<sub>2</sub>DS<sub>2</sub>-VASc) and bleeding (HAS-BLED). [11-13] These registries may not cover the full spectrum of patients with AF, which warrants external validation of these risk scores in other population-based cohorts. We aimed to 1) externally validate the GARFIELD-AF model of ischemic stroke and major bleeding outcomes among patients with newly diagnosed AF in a large contemporary Danish cohort and 2) perform a head-to-head comparison of the predictive properties of GARFIELD-AF model with CHA<sub>2</sub>DS<sub>2</sub>-VASc for thromboembolic events and HAS-BLED for major bleeding. We did not externally validate the GARFIELD-AF model for risk of death, as we did not have blood pressure and heart rate measurements; covariates that the GARFIELD-AF model for death requires.

## MATERIALS AND METHODS

We reported our findings according to the TRIPOD (Transparent reporting of a multivariable prediction model for individual prognosis or diagnosis) criteria. [14]

### Data sources

We used the Danish nationwide registers cross-linking The Civil Registration System, The Danish National Patient Register (DNPR), and The Danish Drug Statistical Registry. The Civil Registration

1  
2  
3 System holds data on age, sex, and vital status. DNPR contains all hospital admissions according to  
4 ICD-10 and procedures. The Danish Drug Statistical Registry was used to characterize  
5 pharmacotherapy in which all claimed drug prescriptions are registered. To compare characteristics  
6 (baseline and outcomes) of the Danish registry we used data from the GARFIELD-AF registry which,  
7 in brief, is an observational, multicentre, international study of newly diagnosed AF with  $\geq 1$  risk factor  
8 for stroke. [15]  
9  
10  
11  
12  
13  
14  
15

### 16 Study population

17  
18 From the DNPR, patients aged  $\geq 18$  years with a primary or secondary diagnosis of AF or atrial flutter  
19 (International Classification of Diseases, Tenth Revision [ICD-10]: I48), hospitalization or outpatient  
20 visit, were included from January 1, 2010 until August 1st 2016 with follow-up to August 1st 2017. The  
21 diagnosis of AF in the DNPR has a positive predictive value of 94.0%. [16] Patients with rheumatic  
22 valvular heart disease or valve interventions were excluded. To allow patients time to fill their  
23 prescriptions after discharge, a 10-day wash-out period was used. Due to no data on race/ethnicity in  
24 the The Civil Registration System, we excluded immigrants and those with missing information on  
25 immigration and presumed Caucasian/European-white for non-immigrants. Given complete nationwide  
26 coverage of DNPR missing data is not present. For baseline characteristic and outcome comparison,  
27 we included the worldwide enrolled GARFIELD-AF patients and the patients enrolled from the  
28 Scandinavian sites; Denmark, Sweden, Norway, Finland (GARFIELD-AF Scandinavia).  
29  
30  
31  
32  
33  
34  
35  
36  
37  
38  
39  
40

### 41 Covariates, GARFIELD-AF model, CHA<sub>2</sub>DS<sub>2</sub>-VASc, and HAS-BLED

42  
43 For the Danish AF cohort, all baseline variables were defined from ICD-10 codes, as any primary or  
44 secondary diagnosis, inpatient or outpatient, registered up to 10 years prior to the inclusion date.  
45 Pharmacotherapy at baseline was identified by Anatomical Therapeutic Chemical (ATC) codes of  
46 prescription drugs claimed up to 180 days prior to the inclusion date. For oral anticoagulants, within  
47 the 180 days the latest prescription filled of either vitamin K antagonist (VKA) or non-vitamin K oral  
48 anticoagulants (NOAC) was used. Prescriptions claimed for anti-diabetic drugs were used as proxy for  
49 diabetes mellitus. Hypertension was defined as claimed prescription for a combination of at least two  
50 of the seven different antihypertensive drugs classes as previously reported. [17] The algorithm for  
51 GARFIELD-AF 1-year risk of ischemic stroke/systemic embolism (SE) relies on the following variables:  
52  
53  
54  
55  
56  
57  
58  
59  
60



1  
2  
3 age (in years), history of ischemic stroke, prior bleeding (any recorded in medical records), heart  
4 failure (medical history of heart failure, or ejection fraction of <40%), chronic kidney disease (CKD)  
5 (stage III-V), race/ethnicity, and use of oral anticoagulant (VKA or NOAC). The algorithm for  
6 GARFIELD-AF 1-year risk of major bleeding/haemorrhagic stroke was developed in patients taking  
7 OAC and involves age, chronic kidney disease (CKD), and vascular disease, in which the latter is  
8 defined as history of myocardial infarction (MI) or unstable angina, aortic, or peripheral artery disease.  
9 The CHA<sub>2</sub>DS<sub>2</sub>-VASc score is composed of age, sex, a history of heart failure, hypertension, stroke,  
10 transient ischemic attack (TIA), thromboembolism, and/or diabetes. HAS-BLED is composed of age,  
11 uncontrolled hypertension, renal disease, liver disease, labile international normalized ratio (INR),  
12 medication use predisposing to bleeding, and a history of stroke, major bleeding and/or predisposition  
13 to bleeding. All covariates were based on ICD-10 codes. The equations for these respective scores  
14 and ICD-10 codes can be found in *Table S1*.

#### 25 26 27 28 Definitions of end points

29 The primary efficacy endpoint for this study involved a 1-year composite of ischemic stroke or SE. The  
30 primary safety endpoint involved a composite of haemorrhagic stroke or major bleeding. Major  
31 bleeding was defined as an organ-specific bleeding requiring hospitalization. [18] A list of ICD-10  
32 codes used to compute these definitions can be found in *Table S2*. In the GARFIELD-AF cohorts, the  
33 occurrence of 'major bleeding' was defined according to the International Society on Thrombosis and  
34 Haemostasis (ISTH) criteria. [11, 15, 19]

#### 35 36 37 38 39 40 41 42 43 Patient and public involvement

44 Patients or the public were not involved in the design of the study

#### 45 46 47 48 49 Statistical Analyses

50 For the Danish AF cohort, we stratified baseline characteristics by CHA<sub>2</sub>DS<sub>2</sub>-VASc score ( $\leq 2$  for  
51 women, 0-1 for men and  $>2$  for women and  $>1$  for men). The Danish AF cohort were followed for a  
52 maximum of 1 year from the discharge date and until the event of interest (stroke/SE or major  
53 bleeding), death, emigration or end of follow-up (August, 2017). For all three cohorts (Danish AF  
54 cohort, GARFIELD Scandinavia, GARFIELD global), 1-year absolute risks of stroke/SE and major  
55  
56  
57  
58  
59  
60

1  
2  
3 bleeding were estimated non-parametrically using the Aalen-Johansen estimator with competing risk  
4 of death. For the Danish AF cohort, using a logistic regression model we used the original coefficients  
5 from the GARFIELD-AF model development study. The discriminative performance of GARFIELD-AF  
6 for predicting ischemic stroke/SE and major bleeding hospitalizations was assessed using receiver  
7 operating characteristics (ROC) curves and reported as area under the curve (AUC) values. The C-  
8 index with 95% confidence intervals (CI) was reported as a measure of discrimination and tested for  
9 significance with DeLong's method. Calibration was assessed by calculating deciles of predicted  
10 probabilities and plotting the average predicting with the observed Kaplan-Meier rate and 95% CI  
11 within each decile. A subgroup analysis for stroke prediction was undertaken for low risk patients. As a  
12 sensitivity analysis, we estimated the logistic regression coefficients for each individual covariate used  
13 in the GARFIELD-AF models. Statistical analyses were performed using R software (Team RC. R: A  
14 Language and Environment for Statistical Computing. 2019).

## 27 28 **RESULTS**

29 From the Danish registries, a total of 110,276 patients were diagnosed with AF between 2010 and  
30 2016. Of those patients, 91,836 met the inclusion criteria for the study (Figure S1). Of these, 70,020  
31 were identified as high risk and 20,673 was identified as low risk of stroke/SE. A total of 51,180 were  
32 on OACs. From the GARFIELD-AF registries, 52,080 patients with AF were included globally, and  
33 2,396 patients were included from the Scandinavian sites.

### 40 41 Characteristics of study participants

42 Baseline characteristics for all three cohorts (Danish AF cohort, GARFIELD Scandinavia, GARFIELD  
43 global) are shown on Table 1. Compared to GARFIELD Scandinavia, the Danish AF cohort had a  
44 more equal representation of men and women (54% vs 58%) and was older (median age 75 vs 73).  
45 There were also notable differences in comorbidities, in which diabetes, hypertension, and chronic  
46 kidney disease were less prevalent in the Danish AF cohort, whereas a history of bleeding (11.6% vs  
47 1.9% vs. 2.5%) was much more prevalent compared with the GARFIELD Scandinavia or global  
48 cohorts. Despite these differences the median CHA<sub>2</sub>DS<sub>2</sub>Vasc scores were comparable among all  
49 cohorts but the HAS-BLED median was higher in the Danish AF cohort. For the GARFIELD model, the  
50 median GARFIELD scores were higher in the Danish AF cohort than both GARFIELD cohorts. The  
51  
52  
53  
54  
55  
56  
57  
58  
59  
60

1  
2  
3 use of OAC therapy was 56.4% in the Danish AF cohort, which was lower than the reported  
4 percentages in GARFIELD Scandinavia (68.0%) and GARFIELD global (60.8%). The use of aspirin,  
5 ADP-inhibitors and NSAIDs was higher in the Danish AF cohort. The characteristics of patients at low  
6 (CHA<sub>2</sub>DS<sub>2</sub>Vasc of 0-1 in men and 1-2 in women; n=20,673) and high risk (n=70,020) for the Danish AF  
7 population is displayed in Table S3. The median [IQR] for CHA<sub>2</sub>DS<sub>2</sub>-VAsc and HAS-BLED scores in  
8 the high-risk group were 4 [3-5] and 2 [2-3].  
9  
10  
11  
12  
13  
14  
15

#### 16 Clinical outcomes at 1-year Follow-up

17  
18 Table 2 displays the number of stroke/SE, major bleeding, and all-cause mortality for the Danish AF  
19 cohort. Over a 1-year follow-up period, a total of 2,094 (2.3%) stroke/SE, 2,642 (2.9%) major  
20 bleedings were reported. Annual mortality rates were high with 10,915 deaths (11.9 per 100 person  
21 years). For the OAC treated patients there were 4,521 deaths (8.8 per 100 person years) and for low  
22 risk patients there were 623 deaths (3.0 per 100 person years). The cumulative incidence for ischemic  
23 stroke to 1-year for low and high-risk patients are presented in Figure S2 for the Danish AF cohort.  
24 The cumulative incidence of stroke/systemic embolism and ischemic stroke for the Danish AF cohort,  
25 GARFIELD Scandinavia, and GARFIELD Global can be found in Figure 1.  
26  
27  
28  
29  
30  
31  
32  
33  
34  
35

#### 36 External validation of GARFIELD-AF model

37  
38 The C-index for the GARFIELD-AF model for 1-year stroke was 0.71 (95%-CI: 0.70-0.72) in the overall  
39 Danish AF cohort of 90,693 patients and 0.64 (95%-CI: 0.59-0.69) in low-risk patients not requiring  
40 OAC therapy (n=20,673). The C-index for the GARFIELD-AF model for 1-year major bleeding risk was  
41 0.64 (95%-CI 0.63-0.66) in patients using OAC therapy. The GARFIELD-AF model for stroke/SE and  
42 major bleeding scores were both well calibrated in the Danish AF cohort (Figure 2 and 3). The  
43 individual covariates in the GARFIELD-AF model expressed a similar regression coefficient for most  
44 covariates in the Danish cohort when compared with the original derivation GARFIELD-AF cohort  
45 (Table S4).  
46  
47  
48  
49  
50  
51  
52  
53  
54

#### 55 GARFIELD-AF model versus CHA<sub>2</sub>DS<sub>2</sub>-VAsc score for predicting stroke/SE

56  
57 The AUC curves for predicting stroke using the GARFIELD model and CHA<sub>2</sub>DS<sub>2</sub>-VAsc scores are  
58 displayed in Figure 4. The AUC and corresponding C-index for GARFIELD was significantly higher  
59  
60

1  
2  
3 when compared with CHA<sub>2</sub>DS<sub>2</sub>Vasc for predicting stroke outcomes, in the overall cohort (C-index:  
4 0.71, 95%-CI: 0.70-0.72 versus 0.67, 95%-CI: 0.66-0.68) as well as in low-risk patients (C-index: 0.62,  
5 95%-CI: 0.59-0.69 versus 0.57, 95%-CI: 0.53-0.61).  
6  
7  
8  
9

#### 10 GARFIELD-AF model versus HAS-BLED score for predicting major bleeding/haemorrhagic stroke

11  
12 Figure 4C illustrates the AUC curves for the prediction of major bleeding based on the GARFIELD and  
13 HAS-BLED scores in patients taking OAC therapy. The discriminatory value of GARFIELD was  
14 comparable with HAS-BLED: C-index: 0.64 (95%-CI: 0.63-0.66) versus C-index: 0.64 (95%-CI: 0.63-  
15 0.65), respectively.  
16  
17  
18  
19

20 Table 3 displays available evidence comparing the discriminatory properties of various models for  
21 stroke/SE and major bleeding.  
22  
23  
24  
25

#### 26 **Discussion**

27  
28  
29  
30 In a large unselected contemporary Danish AF cohort, our study demonstrates that the GARFIELD-AF  
31 model serves as a reliable risk stratification tool. We found that the GARFIELD-AF model surpasses  
32 the widely used CHA<sub>2</sub>DS<sub>2</sub>-VAsc score in predicting the risk of stroke, both in high and low-risk  
33 patients. For predicting major bleeding, the three-item GARFIELD-AF model is on par with HAS-BLED  
34 among anticoagulated patients with AF.  
35  
36  
37  
38  
39  
40

41 Risk-stratification of patients with AF is essential to mitigate the risk of stroke/SE when  
42 initiating anticoagulation therapy. As such, the easy-to-calculate CHA<sub>2</sub>DS<sub>2</sub>-VAsc score serves as the  
43 risk-stratification tool recommended by international guidelines to commence therapy when the risk of  
44 stroke reaches a threshold of >2% per annum. [20] Prior studies have shown that guideline-adherent  
45 (risk-stratified) anticoagulation therapy is associated with a 60-70% reduction in thromboembolic  
46 associated complications and mortality. [21] Despite these reductions in stroke risk, there is still room  
47 for improvement in risk stratification of patients with AF and anticoagulation therapy. In this regard, the  
48 GARFIELD-AF model, which calculates the risk of stroke, death, and major bleeding, is promising,  
49 particularly as it performed better than the CHA<sub>2</sub>DS<sub>2</sub>-VAsc and HAS-BLED. [11] The GARFIELD-AF  
50 model provides estimates of the risk of stroke/SE and bleeding (and mortality when blood pressure  
51  
52  
53  
54  
55  
56  
57  
58  
59  
60

1  
2  
3 and heart rate data are available) in a single calculation and based on routinely collected data would  
4  
5 have potentially wide clinical applications.

6  
7 Underuse of anticoagulation therapy is a well-known problem in particular in high-risk patients.  
8  
9 [22] Our study found that 73.1% of patients with increased stroke risk (n=51,180, CHA<sub>2</sub>DS<sub>2</sub>-VASc>2 in  
10  
11 women and >1 in men) received anticoagulation therapy. Studies suggests that treatment barriers are  
12  
13 based on overestimation of bleeding risks (for example recurrent falls and prior peptic ulcers) and lack  
14  
15 of reliable risk stratification tools and readily available information that does not rely on specific lab  
16  
17 tests such as HAS-BLED. [9, 10, 22]

18  
19  
20 To provide predictions for bleeding risk, several bleeding scores have been developed, of which HAS-  
21  
22 BLED has been most rigorously tested. [23, 24] While the HAS-BLED risk score is clinically useful to  
23  
24 identify patients at high bleeding risk, it requires information that may not always be available in  
25  
26 outpatient and primary care settings, such as information on liver function tests, INR status, and  
27  
28 presence of anemia. This may be a limitation for the implementation of this score in low-resource  
29  
30 settings and is of relevance as the majority (60%) of community-dwelling patients with AF are seen in  
31  
32 primary care. [25, 26] Moreover, primary care physicians achieve lower anticoagulation rates  
33  
34 compared with hospital-based physicians. [27, 28] While there are multiple reasons for these  
35  
36 differences, which include differences in populations, with high percentage of (relative)  
37  
38 contraindications (40-65%) and care-related factors, the lack of an integral decision tool impedes  
39  
40 informed decisions on initiating or continuing antithrombotic therapy. [10, 29]

41  
42 In the present study, the external validation show that GARFIELD-AF is well calibrated with  
43  
44 the predicted risks, and the good calibration aligns well with the original GARFIELD-AF derivation  
45  
46 cohort. [11] GARFIELD-AF score has improved discriminatory abilities compared to CHA<sub>2</sub>DS<sub>2</sub>-VASc  
47  
48 score in stroke prediction and on par with HAS-BLED for bleeding prediction. To our surprise, our  
49  
50 external validation of GARFIELD-AF discriminatory c-index for stroke prediction was slightly higher  
51  
52 (0.71) than the c-index in the original GARFIELD cohort (0.69). Furthermore, the Danish AF cohort  
53  
54 were older with more stroke events than both GARFIELD cohorts and higher predicted risk than the  
55  
56 GARFIELD cohorts. The opposite was the case for major bleeding prediction where the original  
57  
58 GARFIELD cohort had better discriminatory abilities than HAS-BLED. The significant differences in the  
59  
60 cohort characteristics, for example higher HAS-BLED and more use of combined OACs and

1  
2  
3 antiplatelet therapy in the Danish AF cohort, and definitions of covariates and outcomes are likely to  
4 play a key role in both instances.  
5

6  
7 The value of CHA<sub>2</sub>DS<sub>2</sub>-VASc score in defining patients with a truly low risk of stroke is  
8 uncertain, partly because the number of patients to accurately assess lower risk patients in the original  
9 studies was insufficient. [12, 30] The evaluation of the performance of risk scores in this low-risk  
10 category is important, as it determines the threshold when initiating antithrombotic therapy outweighs  
11 the risk of bleeding. In our study we found that the GARFIELD-AF model for low risk patients was well  
12 calibrated and provided a better prediction than CHA<sub>2</sub>DS<sub>2</sub>-VASc score in indicating which patients are  
13 truly at low-risk for subsequent stroke.  
14  
15  
16  
17  
18  
19

### 20 21 22 Limitations and future directions 23

24 The primary limitation of this study is that definitions are based on administrative ICD-10 codes which  
25 are prone to random misclassification bias. Discrepancies exist between the GARFIELD-AF registry  
26 and the Danish registries in the definitions of comorbidities and clinical outcome data. This was most  
27 notable for major bleeding and stroke/SE events and CKD. In the Danish AF cohort, selected ICD-10  
28 codes for bleeding hospitalizations were applied, whereas GARFIELD-AF applied the ISTH criteria for  
29 major bleeding, which are more restrictive. Apart from differences in disease definitions, the relative  
30 high number of bleeding and stroke/SE events in the Danish AF cohort could also be explained by site  
31 of enrollment (only hospital/outpatient). Similar data limitations apply to the construction of CHA<sub>2</sub>DS<sub>2</sub>-  
32 VASc score and HAS-BLED scores which was calculated from ICD-10 code usage although this study  
33 followed the standards set by other researchers using the same Danish registries [17]. Specifically, we  
34 were unable to account for labile INR component of the HAS-BLED score. Another limitation was the  
35 inability to ascertain ethnicity status which is an integrated covariate of the GARFIELD-AF model.  
36  
37 Therefore, we excluded immigrants to strengthen the assumption of European/Caucasian ethnicity in  
38 the cohort. The GARFIELD Scandinavian cohort consisted of 99.3% Caucasians. Population-based  
39 studies in other more ethnically-diverse cohorts are warranted. For the implementation of the  
40 GARFIELD-AF model, an online risk calculator already exist. A next step would be to provide an  
41 electronic health record integrated solution, in which stroke/SE and bleeding risks are automatically  
42 calculated when a patient is identified with AF. Doing so, would promote balanced and evidence-  
43 based decision making on anticoagulation therapy. Integrating the GARFIELD-AF model into  
44  
45  
46  
47  
48  
49  
50  
51  
52  
53  
54  
55  
56  
57  
58  
59  
60

1  
2  
3 electronic health records would also provide a way for anonymous monitoring of outcomes of patients  
4 in which the GARFIELD-AF model was applied, which can be used to further optimize risk prediction.  
5  
6  
7

## 8 9 **Conclusion**

10 The GARFIELD-AF model adequately predicted the risk of ischemic stroke/SE and major  
11 bleeding/haemorrhagic stroke in a nationwide Danish cohort of contemporary patients with non-  
12 valvular AF. Our external validation confirms that the performance of the GARFIELD-AF model was  
13 superior to CHA<sub>2</sub>DS<sub>2</sub>VASc in predicting stroke/SE both in high-risk and in low risk patients and  
14 comparable with HAS-BLED for predicting major bleeding. The GARFIELD-AF model holds an  
15 advantage over the existing risk scores as it permits for simultaneous evaluation of death, stroke and  
16 bleeding risks and uses readily available clinical parameters. As such, the tool may lead to more  
17 informed treatment decisions, improve monitoring for bleeding complications, and improve outcomes  
18 for patients treated for AF in the community.  
19  
20  
21  
22  
23  
24  
25  
26  
27  
28  
29

## 30 Acknowledgments

31 We would like to thank the investigators and participants involved in the GARFIELD-AF registry,  
32 Madhusudana Rao for programming support of GARFIELD-AF tables and Saverio Virdone for  
33 statistical support of GARFIELD-AF survival curves.  
34  
35  
36  
37  
38  
39

## 40 **References**

- 41 1. Lloyd-Jones, D.M., et al., *Lifetime risk for development of atrial fibrillation: the Framingham*  
42 *Heart Study*. Circulation, 2004. **110**(9): p. 1042-6.
- 43 2. Odotayo, A., et al., *Atrial fibrillation and risks of cardiovascular disease, renal disease, and*  
44 *death: systematic review and meta-analysis*. BMJ, 2016. **354**: p. i4482.
- 45 3. Wolf, P.A., R.D. Abbott, and W.B. Kannel, *Atrial fibrillation as an independent risk factor for*  
46 *stroke: the Framingham Study*. Stroke, 1991. **22**(8): p. 983-8.
- 47 4. Hart, R.G., L.A. Pearce, and M.I. Aguilar, *Meta-analysis: antithrombotic therapy to prevent*  
48 *stroke in patients who have nonvalvular atrial fibrillation*. Ann Intern Med, 2007. **146**(12): p.  
49 857-67.
- 50 5. Ruff, C.T., et al., *Comparison of the efficacy and safety of new oral anticoagulants with*  
51 *warfarin in patients with atrial fibrillation: a meta-analysis of randomised trials*. Lancet, 2014.  
52 **383**(9921): p. 955-62.
- 53 6. Cowan, C., et al., *The use of anticoagulants in the management of atrial fibrillation among*  
54 *general practices in England*. Heart, 2013. **99**(16): p. 1166-72.
- 55 7. Huisman, M.V., et al., *Antithrombotic Treatment Patterns in Patients with Newly Diagnosed*  
56 *Nonvalvular Atrial Fibrillation: The GLORIA-AF Registry, Phase II*. Am J Med, 2015. **128**(12):  
57 p. 1306-13 e1.
- 58 8. Wilke, T., et al., *Oral anticoagulation use by patients with atrial fibrillation in Germany.*  
59 *Adherence to guidelines, causes of anticoagulation under-use and its clinical outcomes, based*  
60 *on claims-data of 183,448 patients*. Thromb Haemost, 2012. **107**(6): p. 1053-65.

9. Cox, J.L., et al., *Optimizing primary care management of atrial fibrillation: The rationale and methods of the Integrated Management Program Advancing Community Treatment of Atrial Fibrillation (IMPACT-AF) study*. Am Heart J, 2018. **201**: p. 149-157.
10. van Doorn, S., et al., *Reasons for non-adherence to practice guidelines on stroke prevention in patients with atrial fibrillation: A cross-sectional study in primary care*. Int J Cardiol, 2015. **187**: p. 525-6.
11. Fox, K.A.A., et al., *Improved risk stratification of patients with atrial fibrillation: an integrated GARFIELD-AF tool for the prediction of mortality, stroke and bleed in patients with and without anticoagulation*. BMJ Open, 2017. **7**(12): p. e017157.
12. Lip, G.Y., et al., *Refining clinical risk stratification for predicting stroke and thromboembolism in atrial fibrillation using a novel risk factor-based approach: the euro heart survey on atrial fibrillation*. Chest, 2010. **137**(2): p. 263-72.
13. Pisters, R., et al., *A novel user-friendly score (HAS-BLED) to assess 1-year risk of major bleeding in patients with atrial fibrillation: the Euro Heart Survey*. Chest, 2010. **138**(5): p. 1093-100.
14. Collins, G.S., et al., *Transparent reporting of a multivariable prediction model for individual prognosis or diagnosis (TRIPOD): the TRIPOD statement*. BMJ, 2015. **350**: p. g7594.
15. Kakkar, A.K., et al., *International longitudinal registry of patients with atrial fibrillation at risk of stroke: Global Anticoagulant Registry in the FIELD (GARFIELD)*. Am Heart J, 2012. **163**(1): p. 13-19 e1.
16. Schmidt, M., et al., *The Danish National Patient Registry: a review of content, data quality, and research potential*. Clin Epidemiol, 2015. **7**: p. 449-90.
17. Olesen, J.B., et al., *Validation of risk stratification schemes for predicting stroke and thromboembolism in patients with atrial fibrillation: nationwide cohort study*. BMJ, 2011. **342**: p. d124.
18. van Rein, N., et al., *Major Bleeding Rates in Atrial Fibrillation Patients on Single, Dual, or Triple Antithrombotic Therapy*. Circulation, 2019. **139**(6): p. 775-786.
19. Schulman, S., et al., *Definition of major bleeding in clinical investigations of antihemostatic medicinal products in non-surgical patients*. J Thromb Haemost, 2005. **3**(4): p. 692-4.
20. Kirchhof, P., et al., *2016 ESC Guidelines for the management of atrial fibrillation developed in collaboration with EACTS*. Eur Heart J, 2016. **37**(38): p. 2893-2962.
21. Lip, G.Y., et al., *Improved outcomes with European Society of Cardiology guideline-adherent antithrombotic treatment in high-risk patients with atrial fibrillation: a report from the EORP-AF General Pilot Registry*. Europace, 2015. **17**(12): p. 1777-86.
22. Ogilvie, I.M., et al., *Underuse of oral anticoagulants in atrial fibrillation: a systematic review*. Am J Med, 2010. **123**(7): p. 638-645 e4.
23. Proietti, M., et al., *Predicting Bleeding Events in Anticoagulated Patients With Atrial Fibrillation: A Comparison Between the HAS-BLED and GARFIELD-AF Bleeding Scores*. J Am Heart Assoc, 2018. **7**(18): p. e009766.
24. Yao, X., et al., *Comparison of the CHA2DS2-VASc, CHADS2, HAS-BLED, ORBIT, and ATRIA Risk Scores in Predicting Non-Vitamin K Antagonist Oral Anticoagulants-Associated Bleeding in Patients With Atrial Fibrillation*. Am J Cardiol, 2017. **120**(9): p. 1549-1556.
25. Das, M., et al., *Primary Care Atrial Fibrillation Service: outcomes from consultant-led anticoagulation assessment clinics in the primary care setting in the UK*. BMJ Open, 2015. **5**(12): p. e009267.
26. Kirchhof, P., et al., *Management of patients with atrial fibrillation by primary-care physicians in Germany: 1-year results of the ATRIUM registry*. Clin Cardiol, 2014. **37**(5): p. 277-84.
27. Apenteng, P.N., et al., *Temporal trends in antithrombotic treatment of real-world UK patients with newly diagnosed atrial fibrillation: findings from the GARFIELD-AF registry*. BMJ Open, 2018. **8**(1): p. e018905.
28. Turakhia, M.P., et al., *Differences and trends in stroke prevention anticoagulation in primary care vs cardiology specialty management of new atrial fibrillation: The Retrospective Evaluation and Assessment of Therapies in AF (TREAT-AF) study*. Am Heart J, 2013. **165**(1): p. 93-101 e1.
29. Adderley, N., R. Ryan, and T. Marshall, *The role of contraindications in prescribing anticoagulants to patients with atrial fibrillation: a cross-sectional analysis of primary care data in the UK*. Br J Gen Pract, 2017. **67**(662): p. e588-e597.
30. Friberg, L., M. Skeppholm, and A. Terent, *Benefit of anticoagulation unlikely in patients with atrial fibrillation and a CHA2DS2-VASc score of 1*. J Am Coll Cardiol, 2015. **65**(3): p. 225-32.



1  
2  
3  
4  
5 Funding:

6 REH reports salary support from The Netherlands Organization for Scientific Research (NWO) through  
7 a RUBICON-grant to study bleeding risks associated with NOAC use. FD is funded by Danish Heart  
8 Foundation [Grant nr: 17-R115-A7443-22062] and Gangstedfonden [Grant nr. A35136] and reports  
9 travel grants from Knud Højgaard Fonden, Torben og Alice Frimodts Fond. KSP is funded by the Duke  
10 Clinical Research Institute.  
11  
12  
13  
14  
15

16  
17  
18  
19  
20 Conflicts of interests:

21 KAAF: has received research grants Bayer/Janssen and AstraZeneca and Consulting/Fees Bayer,  
22 Sanofi/Regeneron and Verseon  
23

24 FWAV: has received honoraria for consulting and presentations from Bayer HealthCare, Boehringer  
25 Ibgelheimy, BMSPfizer and Daiichi-Sankyo  
26

27 GG: has ownership of stocks in Novo Nordisk Pharmaceuticals and reports research grants from  
28 Pfizer, Bristol Myers Squibb, Boehringer Ingelheim and Bayer.  
29

30 CTP: declares grants for studies from Bayer.  
31

32 Other authors have no conflicts of interest to declare  
33  
34  
35  
36  
37  
38

39 Patient consent:

40 Obtained  
41  
42  
43  
44

45 Ethics approval:

46 For the GARFIELD-AF registry an independent ethics committee and hospital-based institutional  
47 review board approvals were obtained for the registry protocol. In Denmark, retrospective register  
48 studies do not require approval from the ethics committees. The Danish Data Protection Agency  
49 approved this study (Ref no: 2007-58-0015, I-Suite nr: 02732, GEH-2014-014). Data were made  
50 available in an anonymized format such that specific individuals could not be identified.  
51  
52  
53  
54  
55  
56  
57

58 Contributors:  
59  
60

1  
2  
3 FD, REH, MR, FWAV, KAAF, AKK, HVW and KP contributed to the study concept and design; FD,  
4 and KP conducted the data analysis; REH and FD and drafted the manuscript; all authors critically  
5 reviewed the final draft of the manuscript.  
6  
7  
8  
9  
10  
11

12 Data sharing statement:  
13

14  
15 Due to restrictions related to Danish law and protecting patient privacy, the combined set of data as  
16 used in this study can only be made available through a trusted third party, Statistics Denmark. This  
17 state organisation holds the data used for this study. Any request on data access should be addressed  
18 to Statistics Denmark <https://www.dst.dk/en.aspx#>  
19  
20  
21  
22  
23  
24  
25  
26  
27  
28  
29  
30  
31  
32  
33  
34  
35  
36  
37  
38  
39  
40  
41  
42  
43  
44  
45  
46  
47  
48  
49  
50  
51  
52  
53  
54  
55  
56  
57  
58  
59  
60

**Table 1.** Baseline characteristics of patients from the Danish AF cohort, GARFIELD-AF Scandinavia, and GARFIELD-AF Global registries

|                            | <b>Danish AF cohort</b> | <b>GARFIELD-AF Scandinavia</b> | <b>GARFIELD-AF Global</b> |
|----------------------------|-------------------------|--------------------------------|---------------------------|
| n                          | 90693                   | 2396                           | 52080                     |
| Age (median [IQR])         | 75 [66.0, 83.0]         | 73.0 [66.0, 78.0]              | 71.0 [63.0, 78.0]         |
| Sex, male (%)              | 48486 (53.5)            | 1389 (58.0)                    | 29068 (55.8)              |
| Race, Caucasian (%)        | NA                      | 1860 (99.3)                    | 32028 (63.1)              |
| Diabetes (%)               | 10900 (12.0)            | 387 (16.2)                     | 11555 (22.2)              |
| Stroke/TIA (%)             | 12827 (14.1)            | 325 (13.6)                     | 3879 (7.5)                |
| Systemic embolism (%)      | 448 (0.5)               | 6 (0.3)                        | 335 (0.6)                 |
| History of bleeding (%)    | 10544 (11.6)            | 46 (1.9)                       | 1318 (2.5)                |
| Vascular disease (%)       | 15305 (16.9)            | 268 (11.2)                     | 7682 (14.8)               |
| Chronic kidney disease (%) | 4224 (4.7)              | 185 (7.7)                      | 5360 (10.3)               |
| Heart Failure (%)          | 14961 (16.5)            | 348 (14.5)                     | 11758 (22.6)              |
| Ischemic heart disease (%) | 13445 (14.8)            | 331 (13.8)                     | 11265 (21.6)              |
| Hypertension (%)           | 55665 (61.4)            | 1659 (69.4)                    | 39643 (76.3)              |
| VTE or PE (%)              | 5141 (5.7)              | 77 (3.2)                       | 1355 (2.6)                |
| NOAC (%)                   | 23212 (25.6)            | 521 (21.7)                     | 11004 (21.1)              |
| VKA (%)                    | 27968 (30.8)            | 1110 (46.3)                    | 20708 (39.8)              |
| OAC (%)                    | 51180 (56.4)            | 1631 (68.0)                    | 31712 (60.8)              |
| VKA + AP (%)               | 10773 (11.9)            | 181 (7.6)                      | 4827 (9.4)                |
| NOAC + AP (%)              | 7608 (8.4)              | 47 (2.0)                       | 1896 (3.7)                |
| NSAID (%)                  | 13078 (14.4)            | 23 (1.0)                       | 1701 (3.3)                |
| Acetylsalicylic acid (%)   | 32890 (36.3)            | 413 (17.2)                     | 14636 (28.1)              |

|                                                         |                   |                   |                            |
|---------------------------------------------------------|-------------------|-------------------|----------------------------|
| ADP-inhibitor (%)                                       | 9128 (10.1)       | 89 (3.7)          | 3580 (6.9)                 |
| CABG (%)                                                | 3291 (3.6)        | 92 (3.9)          | 1625 (3.2)                 |
| CHA <sub>2</sub> DS <sub>2</sub> VASC<br>(median [IQR]) | 3.0 [2.0, 4.0]    | 3.0 [2.0, 4.0]    | 3.0 [2.0, 4.0]             |
| CHA <sub>2</sub> DS <sub>2</sub> VASC (%)               |                   |                   |                            |
| 0                                                       | 5678 (6.3)        | 19 (0.8)          | 1516 (2.9)                 |
| 1                                                       | 10231 (11.3)      | 279 (11.7)        | 6369 (12.4)                |
| 2                                                       | 16137 (17.8)      | 530 (22.2)        | 10230 (19.9)               |
| 3                                                       | 20143 (22.2)      | 626 (26.2)        | 12138 (23.6)               |
| 4                                                       | 19378 (21.4)      | 526 (22.1)        | 11022 (21.4)               |
| 5                                                       | 11020 (12.2)      | 238 (10.0)        | 5895 (11.5)                |
| >5                                                      | 8106 (8.9)        | 167 (7.0)         | 4238 (8.2)                 |
| HAS-BLED (median<br>[IQR])                              | 2.0 [1.0, 3.0]    | 1.0 [1.0, 2.0]    | 1.0 [1.0, 2.0]             |
| HAS-BLED category<br>n, missing (%)                     |                   | 1088 (1308)       | 37549 (14531 -<br>missing) |
| 0                                                       | 8297 (9.1)        | 169 (15.5)        | 5471 (14.6)                |
| 1                                                       | 19956 (22.0)      | 507 (46.6)        | 16169 (43.1)               |
| 2                                                       | 31170 (34.4)      | 301 (27.7)        | 11692 (31.1)               |
| 3                                                       | 24998 (27.6)      | 87 (8.0)          | 3570 (9.5)                 |
| >3                                                      | 6272 (6.9)        | 24 (2.2)          | 647 (1.7)                  |
| GARFIELD-AF model,<br>stroke, median (IQR)              | 1.10 [0.75, 1.82] | 0.80 [0.60, 1.10] | 0.90 [0.70-1.40]           |
| GARFIELD-AF model,<br>bleed, median (IQR)               | 1.08 [0.74, 1.54] | 0.90 [0.70,1.30]  | 1.00 [0.70-1.40]           |

Table 1 footnotes. Abbreviations: TIA; transient ischemic attack, SE; systemic embolism, OAC; oral anticoagulants, NOAC; non-vitamin-K antagonist, VKA; vitamin-K antagonist; AP; anti-platelet therapy, NSAID; non-steroidal anti-inflammatory drug, ADP; adenosine diphosphate, CABG; Coronary Artery Bypass Grafting.

1  
2  
3  
4  
5  
6  
7  
8  
9  
10  
11  
12  
13  
14  
15  
16  
17  
18  
19  
20  
21  
22  
23  
24  
25  
26  
27  
28  
29  
30  
31  
32  
33  
34  
35  
36  
37  
38  
39  
40  
41  
42  
43  
44  
45  
46  
47  
48  
49  
50  
51  
52  
53  
54  
55  
56  
57  
58  
59  
60

For peer review only

**Table 2.** Number of events (Stroke/SE, major bleed) and deaths for one 1-year follow-up in all patients, patients on OAC, and low risk patients

|                | Danish AF cohort<br>(n=90693) | Patients treated with<br>OAC (n=51180) | Low risk patients<br>(n=20673) |
|----------------|-------------------------------|----------------------------------------|--------------------------------|
| Stroke         | 2094                          | 994                                    | 139                            |
| Major bleeding | 2642                          | 1492                                   | 242                            |
| Deaths         | 10915                         | 4521                                   | 623                            |

Table 2 footnotes. Low risk patients were defined as CHA<sub>2</sub>DS<sub>2</sub>-VASc score ( $\leq 2$  for women, 0-1 for men and  $>2$  for women and  $>1$  for men). Abbreviations: OAC; oral anticoagulation.

**Table 3.** Available evidence comparing the discriminatory properties of various models for stroke/SE and major bleeding [11, 23]

| Outcome                        | Cohort           | N      | GARFIELD-AF -<br>AUC (95% CI) | CHA <sub>2</sub> DS <sub>2</sub> -VASc<br>/HAS-BLED -<br>AUC (95% CI) |
|--------------------------------|------------------|--------|-------------------------------|-----------------------------------------------------------------------|
| Stroke/SE                      | GARFIELD-AF      | 39,898 | 0.69 (0.67-0.71)              | 0.64 (0.61-0.66)                                                      |
|                                | ORBIT-AF         | 9,743  | 0.69 (0.64-0.75)              | 0.69 (0.64-0.74)                                                      |
|                                | Danish AF cohort | 90,693 | 0.71 (0.70-0.72)              | 0.67 (0.66-0.68)                                                      |
| Stroke/SE low<br>risk patients | GARFIELD-AF      | 7,882  | 0.65 (0.56-0.73)              | 0.59 (0.50-0.67)                                                      |
|                                | Danish AF cohort | 20,673 | 0.64 (0.59-0.69)              | 0.57 (0.53-0.61)                                                      |
| Major bleeding                 | GARFIELD-AF      | 25,677 | 0.66 (0.62-0.69)              | 0.64 (0.61-0.68)                                                      |
|                                | ORBIT-AF         | 7,442  | 0.61 (0.58-0.64)              | -                                                                     |
|                                | SPORTIF III-V    | 3,550  | 0.56 (0.54-0.57)              | 0.58 (0.56-0.60)                                                      |
|                                | Danish AF cohort | 51,180 | 0.64 (0.63-0.66)              | 0.64 (0.63-0.65)                                                      |

**Figure 1.**

*Figure 1 legend.* Cumulative incidence of stroke/systemic embolism (panel A) and major bleeding (panel B) in the Danish AF cohort, GARFIELD-AF Scandinavia, and GARFIELD-AF Global.

**Figure 2.**

*Figure 2 legend.* Calibration plots of GARFIELD-AF model and stroke/SE risk in overall Danish population (A) and in low-risk patients (B). Predicted probability for GARFIELD (blackline), and actual observed cumulative incidence estimates with 95% CI for each GARFIELD score in deciles including a linear regression model (dashed line) and LOESS function of observed probability (red line).

**Figure 3.**

*Figure 3 legend.* Calibration plots of GARFIELD-AF model and major bleeding risk in Danish population. Predicted probability for GARFIELD (blackline), and actual observed cumulative incidence estimates with 95% CI for each GARFIELD score in deciles including a linear regression model (dashed line) and LOESS function of observed probability (red line).

**Figure 4.**

*Figure 4 legend.* Receiver Operating Characteristic curves of GARFIELD-AF model versus CHA<sub>2</sub>DS<sub>2</sub>VASc scores for predicting stroke in (A) the Danish AF cohort and (B) low-risk individuals and (C) GARFIELD-AF model versus HAS-BLED scores for predicting major bleeding in the Danish AF cohort in those receiving oral anticoagulants (n=51,180). Low risk stroke patients were defined as CHA<sub>2</sub>DS<sub>2</sub>-VASc score ( $\leq 2$  for women, 0-1 for men and  $> 2$  for women and  $> 1$  for men).

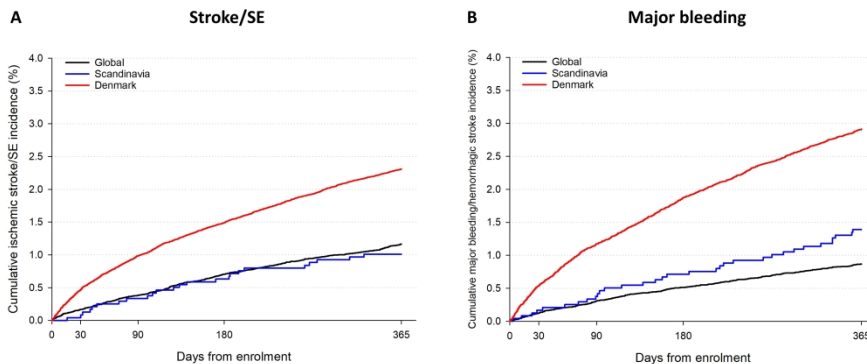

Cumulative incidence of stroke/systemic embolism (panel A) and major bleeding (panel B) in the Danish AF cohort, GARFIELD-AF Scandinavia, and GARFIELD-AF Global.

338x190mm (300 x 300 DPI)



1  
2  
3  
4  
5  
6  
7  
8  
9  
10  
11  
12  
13  
14  
15  
16  
17  
18  
19  
20  
21  
22  
23  
24  
25  
26  
27  
28  
29  
30  
31  
32  
33  
34  
35  
36  
37  
38  
39  
40  
41  
42  
43  
44  
45  
46  
47  
48  
49  
50  
51  
52  
53  
54  
55  
56  
57  
58  
59  
60

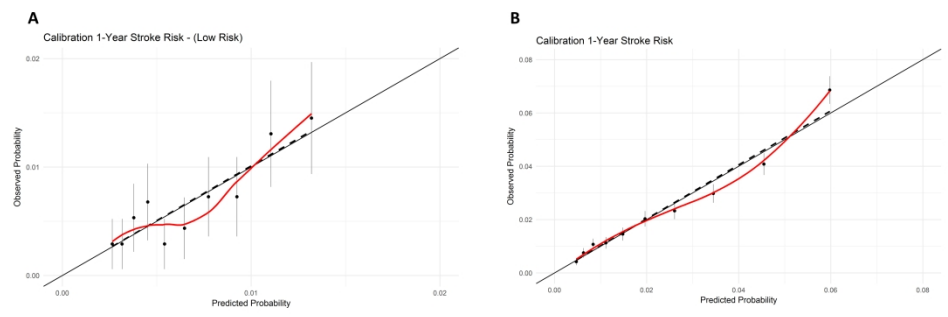

Calibration plots of GARFIELD-AF model and stroke/SE risk in overall Danish population (A) and in low-risk patients (B). Predicted probability for GARFIELD (blackline), and actual observed cumulative incidence estimates with 95% CI for each GARFIELD score in deciles including a linear regression model (dashed line) and LOESS function of observed probability (red line).

350x170mm (300 x 300 DPI)

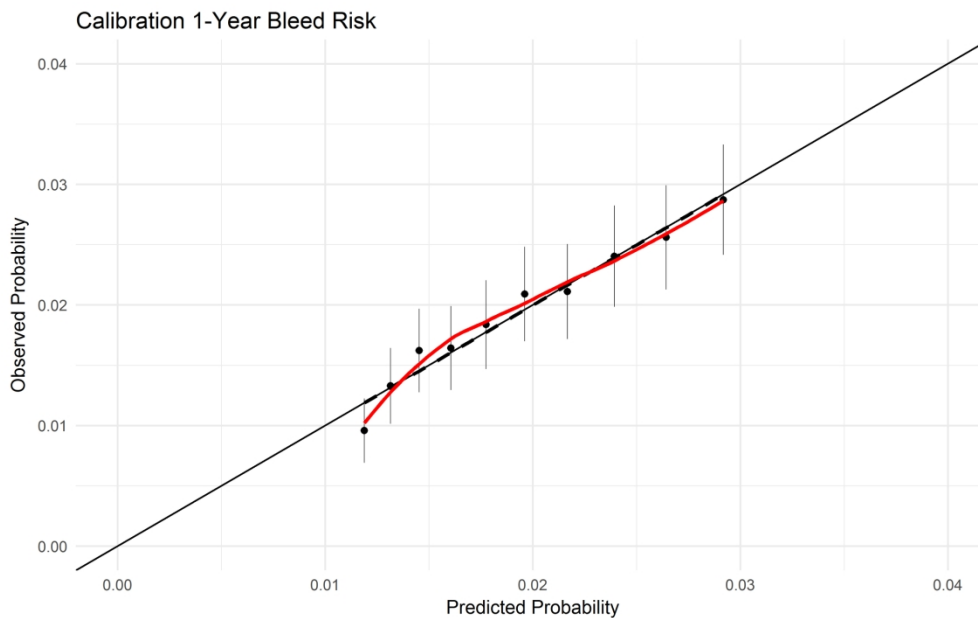

Predicted probability for GARFIELD (blackline), and actual observed cumulative incidence estimates with 95% CI for each GARFIELD score in deciles including a linear regression model (dashed line) and LOESS function of observed probability (red line).

203x127mm (300 x 300 DPI)

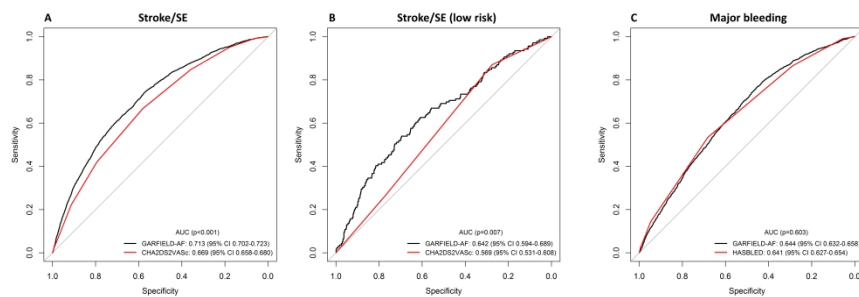

Receiver Operating Characteristic curves of GARFIELD-AF model versus CHA2DS2VASc scores for predicting stroke in (A) the Danish AF cohort and (B) low-risk individuals and (C) GARFIELD-AF model versus HAS-BLED scores for predicting major bleeding in the Danish AF cohort in those receiving oral anticoagulants (n=51,180). Low risk stroke patients were defined as CHA2DS2-VASc score ( $\leq 2$  for women, 0-1 for men and  $>2$  for women and  $>1$  for men).

520x180mm (300 x 300 DPI)

## SUPPLEMENTAL DATA FILE

Table S1. Equations of the risk scores

|                                                       |                                                                                                                                                                                                                                                                                                                             |
|-------------------------------------------------------|-----------------------------------------------------------------------------------------------------------------------------------------------------------------------------------------------------------------------------------------------------------------------------------------------------------------------------|
| GARFIELD-AF stroke/SE<br>(original)                   | $100 * (1 - (0.991344397^{**} (\exp(0.0304823 * (\text{Age} - 60) + 0.952524717 * \text{stroke/TIA/SE} + 0.432357326 * \text{Bleeding} + 0.319129628 * \text{Heart failure} + 0.574919171 * \text{Chronic kidney disease} + 0.654249546 * \text{other region} + 0.671380382 * \text{race} - 0.582045773 * \text{OAC}))))))$ |
| GARFIELD-AF stroke/SE<br>(modified for this analysis) | $100 * (1 - (0.991344397^{**} (\exp(0.0304823 * (\text{Age} - 60) + 0.952524717 * \text{stroke/TIA/SE} + 0.432357326 * \text{Bleeding} + 0.319129628 * \text{Heart failure} + 0.574919171 * \text{Chronic kidney disease} - 0.582045773 * \text{OAC}))))))$                                                                 |
| GARFIELD-AF major bleeding                            | $100 * (1 - (0.994488926^{**} (\exp(0.0389958 * (\text{AGE} - 60) + 0.515013074 * \text{vascular disease} + 0.577378429 * \text{Chronic kidney disease}))))))$                                                                                                                                                              |
| CHA <sub>2</sub> DS <sub>2</sub> -VASc                | <p>65 ≤ age &lt; 75: 1 point</p> <p>Age ≥ 75: 2 point</p> <p>Female sex: 1 point</p> <p>Heart failure: 1 point</p> <p>Hypertension: 1 point</p> <p>Ischemic stroke / TCI / Systemic embolism and thrombosis: 2 points</p> <p>Ischemic Heart Disease or Peripheral atherosclerosis: 1 point</p> <p>Diabetes: 1 point</p>     |
| HAS-BLED                                              | <p>Age &gt; 65: 1 point</p> <p>Hypertension: 1 point</p> <p>Chronic kidney disease: 1 point</p> <p>Liver disease: 1 point</p> <p>Ischemic stroke / TCI / Systemic embolism and thrombosis: 1</p>                                                                                                                            |

1  
2  
3  
4  
5  
6  
7  
8  
9  
10  
11  
12  
13  
14  
15  
16  
17  
18  
19  
20  
21  
22  
23  
24  
25  
26  
27  
28  
29  
30  
31  
32  
33  
34  
35  
36  
37  
38  
39  
40  
41  
42  
43  
44  
45  
46  
47  
48  
49  
50  
51  
52  
53  
54  
55  
56  
57  
58  
59  
60

|  |                                                         |
|--|---------------------------------------------------------|
|  | points                                                  |
|  | Bleeding: 1 point                                       |
|  | ASA or ADP inhibitors or Dipyridamole or NSAID: 1 point |
|  | Alcohol: 1 point                                        |

For peer review only

**Table S2.** Definitions of covariates.

|                                                                                        | ICD-10 codes                                                                                                                                                                                                                                                                                                                                                                                                                                                                                       |
|----------------------------------------------------------------------------------------|----------------------------------------------------------------------------------------------------------------------------------------------------------------------------------------------------------------------------------------------------------------------------------------------------------------------------------------------------------------------------------------------------------------------------------------------------------------------------------------------------|
| Atrial Fibrillation                                                                    | I48                                                                                                                                                                                                                                                                                                                                                                                                                                                                                                |
| Non-Valvular Atrial Fibrillation                                                       | Presence of: I48<br>With absence of:<br>Rheumatic heart valve disease, prostatic heart valve                                                                                                                                                                                                                                                                                                                                                                                                       |
| Rheumatic heart valve disease                                                          | ICD10: Z952, Z954, I05, I06, I080A, I081A, I082A, I083A                                                                                                                                                                                                                                                                                                                                                                                                                                            |
| Prostatic heart valve                                                                  | KFKD, KFKH, KFMD, KFMH, KFGE, KFJF                                                                                                                                                                                                                                                                                                                                                                                                                                                                 |
| Stroke / TIA / Systemic embolism and thrombosis (without hemorrhagic stroke), baseline | Ischemic: I63, I64<br>TIA: G458, G459<br>Systemic embolism and thrombosis: I74                                                                                                                                                                                                                                                                                                                                                                                                                     |
| Stroke/SE, endpoint                                                                    | Ischemic: I63, I64<br>Systemic embolism and thrombosis: I74                                                                                                                                                                                                                                                                                                                                                                                                                                        |
| Hospitalization for any bleeding, baseline                                             | Heart: I312<br>Urine: N02, R31<br>Airways: R04<br>Eye: H313, H356, H431, H450, H052A<br>Gastrointestinal: K228F, K250, K252, K254, K256, K260, K262, K264, K266, K270, K272, K274, K276, K280, K282, K284, K286, K290, K298A, K625, K638B, K638C, K838F, K868G, K920, K921, K922, I850, I864A<br>Intra-dural bleeds not hemorrhagic stroke: S064, S065, S066<br>Hemorrhagic stroke: I60, I61, I62, I690, I691, I692<br>Retro-peritoneal: K661<br>Thorax: J942<br>Anemia due to bleeding: D500, D62 |
| Major bleeding (with hemorrhagic stroke)                                               | Heart: I312<br>Urine; N02, R31<br>Eye: H313, H356, H431, H450<br>Airways: R04<br>Gastrointestinal: K250, K252, K254, K256, K260, K262, K264, K266, K270, K272, K280, K282, K284, K286, K920, K921, K922<br>Intra-dural bleeds not hemorrhagic stroke: S064, S065, S066, I692<br>Hemorrhagic stroke: I60, I61, I62, I690, I691<br>Thorax: J942<br>Retro-peritoneal: K661                                                                                                                            |

|                                                                                                             |                                                                                                                                                                                                                                                                                                                                                                                     |
|-------------------------------------------------------------------------------------------------------------|-------------------------------------------------------------------------------------------------------------------------------------------------------------------------------------------------------------------------------------------------------------------------------------------------------------------------------------------------------------------------------------|
|                                                                                                             | Anemia due to bleeding: D62                                                                                                                                                                                                                                                                                                                                                         |
| Heart Failure                                                                                               | Cardiomyopathy: I42<br>Heart failure: I50, I110<br>Lung edema: J81                                                                                                                                                                                                                                                                                                                  |
| IHD                                                                                                         | Ischemic Heart Disease: I20-I25 <ul style="list-style-type: none"> <li>• Angina pectoris: I20</li> <li>• Acute myocardial infarction: I21, I22</li> <li>• Complications to AMI: I23,</li> <li>• Other forms of ischemic heart disease: I24, I25</li> </ul>                                                                                                                          |
| Peripheral artery disease                                                                                   | I70                                                                                                                                                                                                                                                                                                                                                                                 |
| Vascular disease                                                                                            | Presence of Ischemic heart disease or peripheral artery disease                                                                                                                                                                                                                                                                                                                     |
| Chronic Kidney Disease                                                                                      | N02, N03, N04, N05, N06, N07, N08, N11, N12, N14, N18, N19, N26, N158, N159, N160, N162, N163, N164, N168<br>Q61,<br>E102, E112, E132, E142,<br>I120,<br>M321B                                                                                                                                                                                                                      |
| Pulmonary embolism                                                                                          | I26                                                                                                                                                                                                                                                                                                                                                                                 |
| Alcohol                                                                                                     | F10, K70, E52, T51, K860, E244, G312, I426, O354, Z714, Z721, G621, G721, K292, L278A                                                                                                                                                                                                                                                                                               |
| Liver disease                                                                                               | B15, B16, B17, B18, B19, C22, K70, K71, K72, K73, K74, K75, K76, K77, Z944, I982, D684C                                                                                                                                                                                                                                                                                             |
| Diabetes Mellitus                                                                                           | Insulin: A10A<br>Non-Insulin: A10B                                                                                                                                                                                                                                                                                                                                                  |
| OAC                                                                                                         | VKA: Warfarin: B01AA03, Phenprocoumon: B01AA04<br>NOAC: Dabigatran: B01AE07, Rivaroxaban: B01AF01, Apixaban: B01AF02                                                                                                                                                                                                                                                                |
| Acetylsalicylic acid                                                                                        | B01AC06, N02BA01                                                                                                                                                                                                                                                                                                                                                                    |
| ADP-inhibitors                                                                                              | B01AC04, B01AC24, B10AC22                                                                                                                                                                                                                                                                                                                                                           |
| NSAID                                                                                                       | M01A without M01AX05                                                                                                                                                                                                                                                                                                                                                                |
| Hypertension as usage of combination of at least two of the seven different drugs classes at the same time. | <ol style="list-style-type: none"> <li>1. Non-Loop:<br/>Thiazides C02L, C02DA, C07B, C07D, C09XA52, C03A, C03EA;<br/>Low-ceiling diuretics (excl. thiazides): C03B, C03X, C07C, C08G, C09BA, C09DA; Potassium-sparing agents (spiron): C03D, C03E, C03EB</li> <li>2. Loop: High-ceiling diuretics (Loop) C03C, C03EB</li> <li>3. Antiadrenergic agents: C02A, C02B, C02C</li> </ol> |

|  |                                                                                                                                                                                                                                                                                |
|--|--------------------------------------------------------------------------------------------------------------------------------------------------------------------------------------------------------------------------------------------------------------------------------|
|  | <ol style="list-style-type: none"><li>4. Beta-blockers: C07A, C07B, C07C, C07D, C07F</li><li>5. Vasodilators: C02DB, C02DD, C02DG</li><li>6. Calcium channel blockers: C08, C09BB, C09DB</li><li>7. RASi: C09AA, C09BA, C09BB, C09CA, C09DA, C09DB, C09XA02, C09XA52</li></ol> |
|--|--------------------------------------------------------------------------------------------------------------------------------------------------------------------------------------------------------------------------------------------------------------------------------|

For peer review only



**Table S3.** Baseline characteristics for the Danish population, stratified by CHA<sub>2</sub>DS<sub>2</sub>VASC score. Low (0-1 men, 1-2 women) risk and high-risk.

|                                                      | Low risk       | High risk      |
|------------------------------------------------------|----------------|----------------|
| n                                                    | 20,673         | 70,020         |
| age (median [IQR])                                   | 61 [54, 68]    | 78 [71, 85]    |
| Sex, male (%)                                        | 13083 (63.3)   | 35403 (50.6)   |
| Diabetes (%)                                         | 286 (1.4)      | 10614 (15.2)   |
| Stroke/TIA (%)                                       | 0 (0.0)        | 12827 (18.3)   |
| Systemic embolism (%)                                | 0 (0.0)        | 448 (0.6)      |
| History of bleeding (%)                              | 1154 (5.6)     | 9176 (13.1)    |
| Chronic kidney disease (%)                           | 296 (1.4)      | 3928 (5.6)     |
| Heart failure (%)                                    | 225 (1.1)      | 14736 (21.0)   |
| Ischemic heart disease (%)                           | 492 (2.4)      | 12953 (18.5)   |
| OAC (%)                                              | 8801 (42.6)    | 42379 (60.5)   |
| NOAC (%)                                             | 4307 (20.8)    | 18905 (27.0)   |
| VKA (%)                                              | 4494 (21.7)    | 23474 (33.5)   |
| venous thromboembolism (%)                           | 380 (1.8)      | 2301 (3.3)     |
| Pulmonary embolism (%)                               | 0 (0.0)        | 2460 (3.5)     |
| Dipyridamole (%)                                     | 78 (0.4)       | 2629 (3.8)     |
| Hypertension (%)                                     | 3601 (17.4)    | 52064 (74.4)   |
| NSAID (%)                                            | 3113 (15.1)    | 9965 (14.2)    |
| Acetylsalicylic acid (%)                             | 3685 (17.8)    | 29205 (41.7)   |
| ADP-inhibitor (%)                                    | 335 (1.6)      | 8793 (12.6)    |
| PCI (%)                                              | 252 (1.2)      | 6104 (8.7)     |
| CABG (%)                                             | 109 (0.5)      | 3182 (4.5)     |
| CHA <sub>2</sub> DS <sub>2</sub> VASC (median [IQR]) | 1.0 [0.0, 1.0] | 4.0 [3.0, 5.0] |
| CHA <sub>2</sub> DS <sub>2</sub> VASC (%)            |                |                |
| 0                                                    | 5678 (27.5)    | -              |

|                                   |                   |                   |
|-----------------------------------|-------------------|-------------------|
| 1                                 | 10231 (49.5)      | -                 |
| 2                                 | 4764 (23.0)       | 11373 (16.2)      |
| 3                                 | -                 | 20143 (28.8)      |
| 4                                 | -                 | 19378 (27.7)      |
| 5                                 | -                 | 11020 (15.7)      |
| >5                                | -                 | 8106 (11.6)       |
| HAS-BLED (median [IQR])           | 1.0 [0.0, 1.0]    | 2.0 [2.0, 3.0]    |
| HAS-BLED category (%)             |                   |                   |
| 0                                 | 7844 (37.9)       | 453 (0.6)         |
| 1                                 | 9297 (45.0)       | 10659 (15.2)      |
| 2                                 | 3083 (14.9)       | 28087 (40.1)      |
| 3                                 | 400 (1.9)         | 24598 (35.1)      |
| >3                                | 49 (0.2)          | 6223 (8.9)        |
| GARFIELD-AF stroke (median [IQR]) | 0.68 [0.52, 0.94] | 1.33 [0.89, 2.09] |
| GARFIELD-AF, bleed (median [IQR]) | 0.59 [0.44, 0.76] | 1.27 [0.95, 1.69] |

Table S3 footnotes. Abbreviations. TIA; transient ischemic attack, SE; systemic embolism, OAC; oral anticoagulants, NOAC; non-vitamin-K antagonist, VKA; vitamin-K antagonist; NSAID; non-steroidal anti-inflammatory drug, ADP; adenosine diphosphate, PCI; Percutaneous coronary intervention, CABG; Coronary Artery Bypass Grafting.

**Table S4.** Logistic regression coefficients of GARFIELD-AF model for stroke/SE and major bleeding in the GARFIELD-AF Global cohort and the Danish AF cohort.

| Variable               | GARFIELD-AF Global registry | Danish AF cohort | P value* |
|------------------------|-----------------------------|------------------|----------|
| <b>Stroke/SE</b>       |                             |                  |          |
| Age                    | 0.030                       | 0.026            | <0.001   |
| Prior Stroke/SE        | 0.952                       | 1.572            | <0.001   |
| Bleeding               | 0.432                       | 0.191            | 0.001    |
| Heart failure          | 0.319                       | 0.065            | 0.269    |
| Chronic kidney disease | 0.574                       | 0.091            | 0.332    |
| OAC                    | -0.582                      | -0.396           | <0.001   |
| <b>Major bleeding</b>  |                             |                  |          |
| Age                    | 0.039                       | 0.041            | <0.001   |
| Vascular disease       | 0.515                       | 0.363            | <0.001   |
| Chronic kidney disease | 0.577                       | 0.865            | <0.001   |

Table S4 footnotes. Abbreviations. SE; systemic embolism, OAC; oral anticoagulant.

\* P value for coefficients in the Danish AF cohort

Figure S1. Flowchart of study population

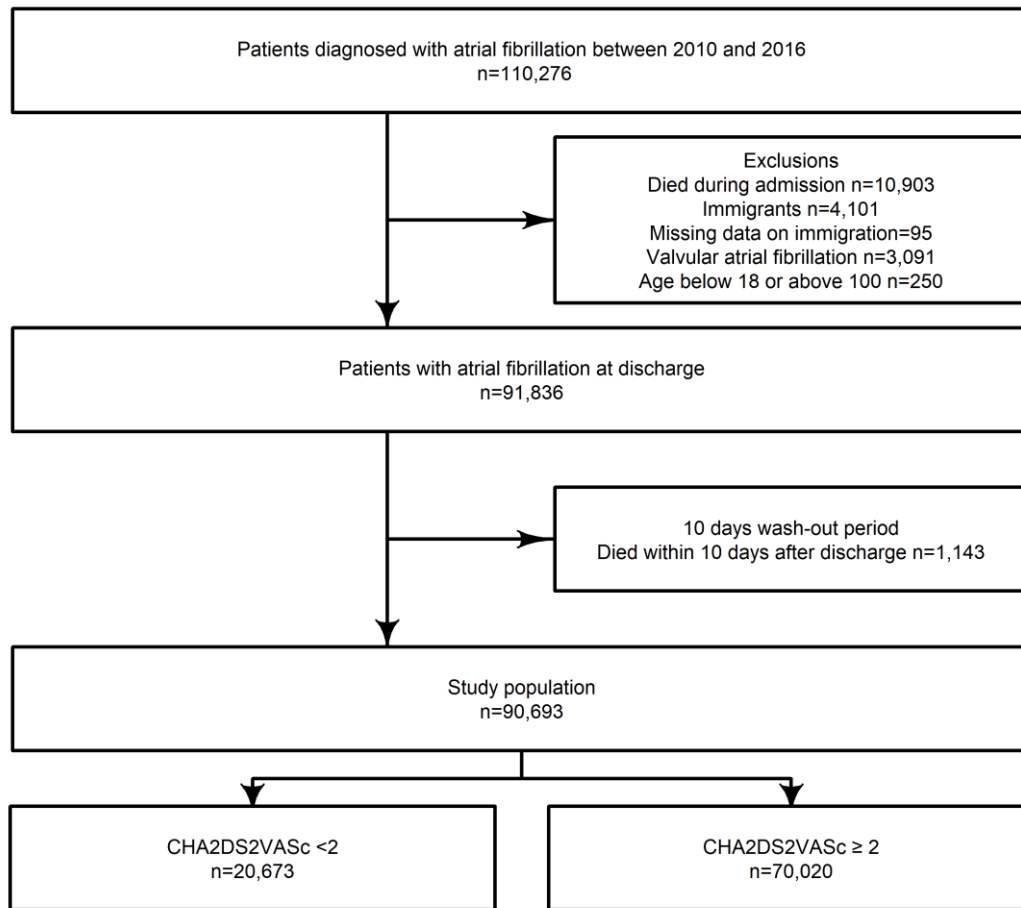

only

**Figure S2.** Cumulative incidence of ischemic stroke in the Danish population stratified by low and high stroke risk

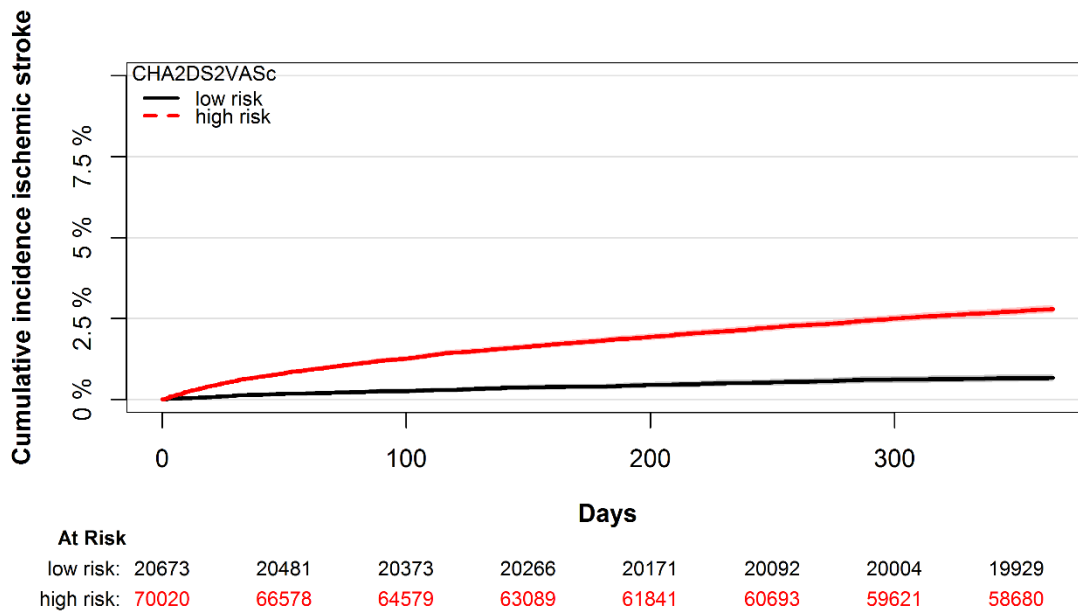

**Figure S2 legend.** Low risk patients were defined as CHA<sub>2</sub>DS<sub>2</sub>-VASc score (≤2 for women, 0-1 for men and >2 for women and >1 for men).

Review only

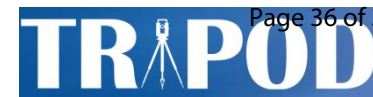

## TRIPOD Checklist: Prediction Model Validation

| Section/Topic                | Item | Checklist Item                                                                                                                                                                                        | Page  |
|------------------------------|------|-------------------------------------------------------------------------------------------------------------------------------------------------------------------------------------------------------|-------|
| <b>Title and abstract</b>    |      |                                                                                                                                                                                                       |       |
| Title                        | 1    | Identify the study as developing and/or validating a multivariable prediction model, the target population, and the outcome to be predicted.                                                          | 1     |
| Abstract                     | 2    | Provide a summary of objectives, study design, setting, participants, sample size, predictors, outcome, statistical analysis, results, and conclusions.                                               | 2     |
| <b>Introduction</b>          |      |                                                                                                                                                                                                       |       |
| Background and objectives    | 3a   | Explain the medical context (including whether diagnostic or prognostic) and rationale for developing or validating the multivariable prediction model, including references to existing models.      | 4     |
|                              | 3b   | Specify the objectives, including whether the study describes the development or validation of the model or both.                                                                                     | 4     |
| <b>Methods</b>               |      |                                                                                                                                                                                                       |       |
| Source of data               | 4a   | Describe the study design or source of data (e.g., randomized trial, cohort, or registry data), separately for the development and validation data sets, if applicable.                               | 5     |
|                              | 4b   | Specify the key study dates, including start of accrual; end of accrual; and, if applicable, end of follow-up.                                                                                        | 5     |
| Participants                 | 5a   | Specify key elements of the study setting (e.g., primary care, secondary care, general population) including number and location of centres.                                                          | 5     |
|                              | 5b   | Describe eligibility criteria for participants.                                                                                                                                                       | 5     |
|                              | 5c   | Give details of treatments received, if relevant.                                                                                                                                                     | 5-6   |
| Outcome                      | 6a   | Clearly define the outcome that is predicted by the prediction model, including how and when assessed.                                                                                                | 6     |
|                              | 6b   | Report any actions to blind assessment of the outcome to be predicted.                                                                                                                                | 6     |
| Predictors                   | 7a   | Clearly define all predictors used in developing or validating the multivariable prediction model, including how and when they were measured.                                                         | 6     |
|                              | 7b   | Report any actions to blind assessment of predictors for the outcome and other predictors.                                                                                                            | 6     |
| Sample size                  | 8    | Explain how the study size was arrived at.                                                                                                                                                            | 5-6   |
| Missing data                 | 9    | Describe how missing data were handled (e.g., complete-case analysis, single imputation, multiple imputation) with details of any imputation method.                                                  | 5-6   |
| Statistical analysis methods | 10c  | For validation, describe how the predictions were calculated.                                                                                                                                         | 7     |
|                              | 10d  | Specify all measures used to assess model performance and, if relevant, to compare multiple models.                                                                                                   | 7     |
|                              | 10e  | Describe any model updating (e.g., recalibration) arising from the validation, if done.                                                                                                               | 7     |
| Risk groups                  | 11   | Provide details on how risk groups were created, if done.                                                                                                                                             | 6-7   |
| Development vs. validation   | 12   | For validation, identify any differences from the development data in setting, eligibility criteria, outcome, and predictors.                                                                         | 7     |
| <b>Results</b>               |      |                                                                                                                                                                                                       |       |
| Participants                 | 13a  | Describe the flow of participants through the study, including the number of participants with and without the outcome and, if applicable, a summary of the follow-up time. A diagram may be helpful. | 7-8   |
|                              | 13b  | Describe the characteristics of the participants (basic demographics, clinical features, available predictors), including the number of participants with missing data for predictors and outcome.    | 7-8   |
|                              | 13c  | For validation, show a comparison with the development data of the distribution of important variables (demographics, predictors and outcome).                                                        | 7-9   |
| Model performance            | 16   | Report performance measures (with CIs) for the prediction model.                                                                                                                                      | 8-9   |
| Model-updating               | 17   | If done, report the results from any model updating (i.e., model specification, model performance).                                                                                                   | 8-9   |
| <b>Discussion</b>            |      |                                                                                                                                                                                                       |       |
| Limitations                  | 18   | Discuss any limitations of the study (such as nonrepresentative sample, few events per predictor, missing data).                                                                                      | 11-12 |
| Interpretation               | 19a  | For validation, discuss the results with reference to performance in the development data, and any other validation data.                                                                             | 9-11  |
|                              | 19b  | Give an overall interpretation of the results, considering objectives, limitations, results from similar studies, and other relevant evidence.                                                        | 9-11  |
| Implications                 | 20   | Discuss the potential clinical use of the model and implications for future research.                                                                                                                 | 9-12  |
| <b>Other information</b>     |      |                                                                                                                                                                                                       |       |
| Supplementary information    | 21   | Provide information about the availability of supplementary resources, such as study protocol, Web calculator, and data sets.                                                                         | NA    |
| Funding                      | 22   | Give the source of funding and the role of the funders for the present study.                                                                                                                         | 14    |

We recommend using the TRIPOD Checklist in conjunction with the TRIPOD Explanation and Elaboration document.

# BMJ Open

## GARFIELD-AF Model for Prediction of Stroke and Major Bleeding in Atrial Fibrillation: A Danish Nationwide Validation Study

|                                 |                                                                                                                                                                                                                                                                                                                                                                                                                                                                                                                                                                                                                                                                                                                                                                                                                                                                |
|---------------------------------|----------------------------------------------------------------------------------------------------------------------------------------------------------------------------------------------------------------------------------------------------------------------------------------------------------------------------------------------------------------------------------------------------------------------------------------------------------------------------------------------------------------------------------------------------------------------------------------------------------------------------------------------------------------------------------------------------------------------------------------------------------------------------------------------------------------------------------------------------------------|
| Journal:                        | <i>BMJ Open</i>                                                                                                                                                                                                                                                                                                                                                                                                                                                                                                                                                                                                                                                                                                                                                                                                                                                |
| Manuscript ID                   | bmjopen-2019-033283.R1                                                                                                                                                                                                                                                                                                                                                                                                                                                                                                                                                                                                                                                                                                                                                                                                                                         |
| Article Type:                   | Original research                                                                                                                                                                                                                                                                                                                                                                                                                                                                                                                                                                                                                                                                                                                                                                                                                                              |
| Date Submitted by the Author:   | 03-Oct-2019                                                                                                                                                                                                                                                                                                                                                                                                                                                                                                                                                                                                                                                                                                                                                                                                                                                    |
| Complete List of Authors:       | Dalgaard, Frederik; Gentofte Hospital, Cardiology;<br>Pieper, Karen; Thrombosis Research Institute<br>Verheugt, Freek; Onze Lieve Vrouwe Gasthuis<br>Camm, John; University of London St George's Molecular and Clinical Sciences Research Institute<br>Fox, Keith; University of Edinburgh and Royal Infirmary of Edinburgh, Cardiology<br>Kakkar, Ajay ; Thrombosis Research Institute<br>Pallisgaard, Jannik; Bispebjerg Hospital<br>Rasmussen, Peter; Gentofte Hospital, Cardiology<br>Weert, Henk; AMC, General practice<br>Lindhardt, Tommi; Gentofte Hospital, Cardiology<br>Torp-Pedersen, Christian; Nordsjællands Hospital, Department of Clinical Investigation and Cardiology<br>Gislason, Gunnar; Gentofte Hospital, Cardiology<br>Ruwald, Martin; Gentofte Hospital, Cardiology<br>Harskamp, Ralf; Academic Medical Center Amsterdam, cardiology |
| <b>Primary Subject Heading</b>: | Cardiovascular medicine                                                                                                                                                                                                                                                                                                                                                                                                                                                                                                                                                                                                                                                                                                                                                                                                                                        |
| Secondary Subject Heading:      | Epidemiology                                                                                                                                                                                                                                                                                                                                                                                                                                                                                                                                                                                                                                                                                                                                                                                                                                                   |
| Keywords:                       | Stroke < NEUROLOGY, CARDIOLOGY, Pacing & electrophysiology < CARDIOLOGY                                                                                                                                                                                                                                                                                                                                                                                                                                                                                                                                                                                                                                                                                                                                                                                        |
|                                 |                                                                                                                                                                                                                                                                                                                                                                                                                                                                                                                                                                                                                                                                                                                                                                                                                                                                |

SCHOLARONE™  
Manuscripts

# GARFIELD-AF Model for Prediction of Stroke and Major Bleeding in Atrial Fibrillation: A Danish Nationwide Validation Study

Frederik Dalgaard, MD [1,2], Karen S. Pieper, MS [2,3], Freek W.A. Verheugt, MD, PhD [4], A. John Camm, MD, QHP, BSc [5] Keith AA Fox, MB, ChB [6], Ajay K. Kakkar, BSc, MBBS, PhD, FRCS [3,7], Jannik L. Pallisgaard, MD, PhD [8], Peter Vibe Rasmussen, MD [1], Henk van Weert [9] Tommi Bo Lindhardt, MD, PhD [1], Christian Torp-Pedersen, MD, DMSc, [1,10] Gunnar Gislason, MD, PhD [1,11,12], Martin H. Ruwald, MD, PhD [1], Ralf E. Harskamp, MD, PhD [9]

[1] Department of Cardiology, Herlev and Gentofte Hospital, Hellerup, Denmark

[2] Duke Clinical Research Institute, Durham NC, USA

[3] Thrombosis Research Institute, London, UK

[4] Onze Lieve Vrouwe Gasthuis (OLVG), Amsterdam, The Netherlands

[5] St. George's University of London, London, UK

[6] University of Edinburgh, United Kingdom

[7] University College London, United Kingdom

[8] Copenhagen University Hospital Bispebjerg, Denmark

[9] Amsterdam University Medical Center – AMC, Amsterdam, The Netherlands

[10] Department of Clinical Investigation and Cardiology, Nordsjaelland Hospital, Hillerød, Denmark

[11] The Danish Heart Foundation, Copenhagen, Denmark

[12] The National Institute of Public Health, University of Southern Denmark, Copenhagen, Denmark

Corresponding author:

Frederik Dalgaard

Department of Cardiology, Copenhagen University Hospital Herlev and Gentofte

Kildegaardsvej 28, 2900 Hellerup, Denmark

Telephone: 0045 38673867, Fax number: 0045 70201283

E-mail: frederik.dalgaard@regionh.dk

Twitter: @F\_dalgaard



Word count:

3,159

For peer review only

1  
2  
3  
4  
5  
6  
7  
8  
9  
10  
11  
12  
13  
14  
15  
16  
17  
18  
19  
20  
21  
22  
23  
24  
25  
26  
27  
28  
29  
30  
31  
32  
33  
34  
35  
36  
37  
38  
39  
40  
41  
42  
43  
44  
45  
46  
47  
48  
49  
50  
51  
52  
53  
54  
55  
56  
57  
58  
59  
60

## Abstract

**Objectives:** To externally validate the accuracy of the GARFIELD-AF model against existing risk scores for stroke and major bleeding risk in patients with non-valvular atrial fibrillation (AF) in a population-based cohort.

**Design:** Retrospective cohort study.

**Setting:** Danish nationwide registries.

**Participants:** 90,693 patients with newly diagnosed non-valvular AF were included between 2010 and 2016, with follow-up censored at 1-year.

**Primary and secondary outcome measures:** External validation was performed using discrimination and calibration plots. C-statistics were compared with CHA<sub>2</sub>DS<sub>2</sub>VASc for ischemic stroke/systemic embolism (SE) and HAS-BLED for major bleeding/hemorrhagic stroke outcomes.

**Results:** Of the 90,693 included, 51,180 patients received oral anticoagulants (OAC). Overall median age (Q1, Q3) were 75 (66-83) years and 48,486 (53.5%) were male. At 1-year follow-up, a total of 2,094 (2.3%) strokes/SE, 2,642 (2.9%) major bleedings and 10,915 (12.0%) deaths occurred. The GARFIELD-AF model was well calibrated with the predicted risk for stroke/SE and major bleeding. The discriminatory value of GARFIELD-AF risk model was superior to CHA<sub>2</sub>DS<sub>2</sub>VASc for predicting stroke in the overall cohort (C-index:0.71,95%-confidence interval (CI):0.70-0.72 versus C-index:0.67,95%-CI:0.66-0.68, p<0.001) as well as in low-risk patients (C-index:0.64,95%-CI:0.59-0.69 versus C-index:0.57,95%-CI:0.53-0.61, p=0.007). The GARFIELD-AF model was comparable to HAS-BLED in predicting the risk of major bleeding in patients on OAC therapy (C-index:0.64,95%-CI:0.63-0.66 versus C-index:0.64,95%-CI: 0.63-0.65, p=0.60).

**Conclusion:** In a nationwide Danish cohort with non-valvular AF, the GARFIELD-AF model adequately predicted the risk of ischemic stroke/SE and major bleeding. Our external validation confirms that the

1  
2  
3 GARFIELD-AF model was superior to CHA<sub>2</sub>DS<sub>2</sub>VASc in predicting stroke/SE and comparable with  
4  
5 HAS-BLED for predicting major bleeding.  
6  
7

#### 8 9 **Strengths and limitations of this study**

- 10 • This validation study was able to compare prediction performance GARFIELD-AF model  
11 versus CHA<sub>2</sub>DS<sub>2</sub>VASc for stroke and HAS-BLED for major bleeding in patients with atrial  
12 fibrillation.  
13  
14
- 15 • This study used a large contemporary population-based cohort with atrial fibrillation with many  
16 events and very limited loss to follow-up.  
17  
18
- 19 • The validation was based on ICD-10 coding from the Danish registries which is prone to  
20 misclassification bias and lacked clinical measurements.  
21  
22  
23  
24  
25  
26  
27  
28  
29  
30  
31  
32  
33  
34  
35  
36  
37  
38  
39  
40  
41  
42  
43  
44  
45  
46  
47  
48  
49  
50  
51  
52  
53  
54  
55  
56  
57  
58  
59  
60

## INTRODUCTION

Atrial fibrillation (AF) is a common cardiac arrhythmia with a lifetime prevalence of 20-30% and is the cause of one in four strokes. [1] AF is associated with an increased risk of several cardiovascular conditions, most notably a nearly 5-fold increased stroke risk. [2, 3] The risk of stroke can be substantially diminished by thrombotic prophylaxis. [4, 5] However, 20-40% of potentially eligible patients do not receiving oral anticoagulant (OAC) therapy. [6-8] The most important and modifiable contributing factor is inappropriate risk assessment, with underutilization of existing risk scores, resulting in overestimation of bleeding risks and underestimation of potential stroke risk. [9, 10] Recently, the Global Anticoagulant Registry in the FIELD –Atrial Fibrillation (GARFIELD-AF) model was developed that allowed for simultaneous calculation of death, stroke, and bleeding risks in an international prospective registry of patients with newly diagnosed AF. [11] In the GARFIELD-AF and ORBIT-AF registries, the GARFIELD-AF model was found to improve discrimination of the existing risk scores for stroke (CHA<sub>2</sub>DS<sub>2</sub>-VASc) and bleeding (HAS-BLED). [11-13] These registries may not cover the full spectrum of patients with AF, which warrants external validation of these risk scores in other population-based cohorts. We aimed to 1) externally validate the GARFIELD-AF model of ischemic stroke and major bleeding outcomes among patients with newly diagnosed AF in a large contemporary Danish cohort and 2) perform a head-to-head comparison of the predictive properties of GARFIELD-AF model with CHA<sub>2</sub>DS<sub>2</sub>-VASc for thromboembolic events and HAS-BLED for major bleeding. We did not externally validate the GARFIELD-AF model for risk of death, as we did not have blood pressure and heart rate measurements; covariates that the GARFIELD-AF model for death requires.

## MATERIALS AND METHODS

We reported our findings according to the TRIPOD (Transparent reporting of a multivariable prediction model for individual prognosis or diagnosis) criteria. [14]

### Data sources

We used the Danish nationwide registers cross-linking The Civil Registration System, The Danish National Patient Register (DNPR), and The Danish Drug Statistical Registry. The Civil Registration

1  
2  
3 System holds data on age, sex, and vital status. DNPR contains all hospital admissions according to  
4 ICD-10 and procedures. The Danish Drug Statistical Registry was used to characterize  
5 pharmacotherapy in which all claimed drug prescriptions are registered. To compare characteristics  
6 (baseline and outcomes) of the Danish registry we used data from the GARFIELD-AF registry which,  
7 in brief, is an observational, multicentre, international study of newly diagnosed AF with  $\geq 1$  risk factor  
8 for stroke. [15]  
9  
10  
11  
12  
13  
14  
15

### 16 Study population

17  
18 From the DNPR, patients aged  $\geq 18$  years with a primary or secondary diagnosis of AF or atrial flutter  
19 (International Classification of Diseases, Tenth Revision [ICD-10]: I48), hospitalization or outpatient  
20 visit, were included from January 1, 2010 until August 1st 2016 with follow-up to August 1st 2017. The  
21 diagnosis of AF in the DNPR has a positive predictive value of 94.0%. [16] Patients with rheumatic  
22 valvular heart disease or valve interventions were excluded. To allow patients time to fill their  
23 prescriptions after discharge, a 10-day wash-out period was used. Due to no data on race/ethnicity in  
24 the The Civil Registration System, we excluded immigrants and those with missing information on  
25 immigration and presumed Caucasian/European-white for non-immigrants. Given complete nationwide  
26 coverage of DNPR missing data is not present. For baseline characteristic and outcome comparison,  
27 we included the worldwide enrolled GARFIELD-AF patients and the patients enrolled from the  
28 Scandinavian sites; Denmark, Sweden, Norway, Finland (GARFIELD-AF Scandinavia).  
29  
30  
31  
32  
33  
34  
35  
36  
37  
38  
39  
40

### 41 Covariates, GARFIELD-AF model, CHA<sub>2</sub>DS<sub>2</sub>-VASc, and HAS-BLED

42  
43 For the Danish AF cohort, all baseline variables were defined from ICD-10 codes, as any primary or  
44 secondary diagnosis, inpatient or outpatient, registered up to 10 years prior to the inclusion date.  
45 Pharmacotherapy at baseline was identified by Anatomical Therapeutic Chemical (ATC) codes of  
46 prescription drugs claimed up to 180 days prior to the inclusion date. For oral anticoagulants, within  
47 the 180 days the latest prescription filled of either vitamin K antagonist (VKA) or non-vitamin K oral  
48 anticoagulants (NOAC) was used. Prescriptions claimed for anti-diabetic drugs were used as proxy for  
49 diabetes mellitus. Hypertension was defined as claimed prescription for a combination of at least two  
50 of the seven different antihypertensive drugs classes as previously reported. [17] The algorithm for  
51 GARFIELD-AF 1-year risk of ischemic stroke/systemic embolism (SE) relies on the following variables:  
52  
53  
54  
55  
56  
57  
58  
59  
60

1  
2  
3 age (in years), history of ischemic stroke, prior bleeding (any recorded in medical records), heart  
4 failure (medical history of heart failure, or ejection fraction of <40%), chronic kidney disease (CKD)  
5 (stage III-V), race/ethnicity, and use of oral anticoagulant (VKA or NOAC). The algorithm for  
6 GARFIELD-AF 1-year risk of major bleeding/haemorrhagic stroke was developed in patients taking  
7 OAC and involves age, chronic kidney disease (CKD), and vascular disease, in which the latter is  
8 defined as history of myocardial infarction (MI) or unstable angina, aortic, or peripheral artery disease.  
9 The CHA<sub>2</sub>DS<sub>2</sub>-VASc score is composed of age, sex, a history of heart failure, hypertension, stroke,  
10 transient ischemic attack (TIA), thromboembolism, and/or diabetes. HAS-BLED is composed of age,  
11 uncontrolled hypertension, renal disease, liver disease, labile international normalized ratio (INR),  
12 medication use predisposing to bleeding, and a history of stroke, major bleeding and/or predisposition  
13 to bleeding. All covariates were based on ICD-10 codes. The equations for these respective scores  
14 and ICD-10 codes can be found in *Table S1*.

#### 25 26 27 28 Definitions of end points

29 The primary efficacy endpoint for this study involved a 1-year composite of ischemic stroke or SE. The  
30 primary safety endpoint involved a composite of haemorrhagic stroke or major bleeding. Major  
31 bleeding was defined as an organ-specific bleeding requiring hospitalization. [18] A list of ICD-10  
32 codes used to compute these definitions can be found in *Table S2*. In the GARFIELD-AF cohorts, the  
33 occurrence of 'major bleeding' was defined according to the International Society on Thrombosis and  
34 Haemostasis (ISTH) criteria. [11, 15, 19]

#### 41 42 43 Patient and public involvement

44 Patients or the public were not involved in the design of the study

#### 45 46 47 48 49 Statistical Analyses

50 For the Danish AF cohort, we stratified baseline characteristics by CHA<sub>2</sub>DS<sub>2</sub>-VASc score ( $\leq 2$  for  
51 women, 0-1 for men and  $>2$  for women and  $>1$  for men). The Danish AF cohort were followed for a  
52 maximum of 1 year from the discharge date and until the event of interest (stroke/SE or major  
53 bleeding), death, emigration or end of follow-up (August, 2017). For all three cohorts (Danish AF  
54 cohort, GARFIELD Scandinavia, GARFIELD global), 1-year absolute risks of stroke/SE and major  
55  
56  
57  
58  
59  
60

1  
2  
3 bleeding were estimated non-parametrically using the Aalen-Johansen estimator with competing risk  
4 of death. For the Danish AF cohort, using a logistic regression model we used the original coefficients  
5 from the GARFIELD-AF model development study. The discriminative performance of GARFIELD-AF  
6 for predicting ischemic stroke/SE and major bleeding hospitalizations was assessed using receiver  
7 operating characteristics (ROC) curves and reported as area under the curve (AUC) values. The C-  
8 index with 95% confidence intervals (CI) was reported as a measure of discrimination. As there was  
9 no censoring issue because the data did not contain any loss to follow-up within the first year of the  
10 study period, the significance test of C-index differences was tested for significance with DeLong's  
11 method. [20] Calibration was assessed by calculating deciles of predicted probabilities and plotting the  
12 average predicting with the observed Kaplan-Meier rate and 95% CI within each decile. A subgroup  
13 analysis for stroke prediction was undertaken for low risk patients. As a sensitivity analysis, we  
14 estimated the logistic regression coefficients for each individual covariate used in the GARFIELD-AF  
15 models. Statistical analyses were performed using R software (Team RC. R: A Language and  
16 Environment for Statistical Computing. 2019).

## 31 RESULTS

32 From the Danish registries, a total of 110,276 patients were diagnosed with AF between 2010 and  
33 2016. Of those patients, 91,836 met the inclusion criteria for the study (Figure S1). Of these, 70,020  
34 were identified as high risk and 20,673 was identified as low risk of stroke/SE. A total of 51,180 were  
35 on OACs. From the GARFIELD-AF registries, 52,080 patients with AF were included globally, and  
36 2,396 patients were included from the Scandinavian sites.

### 45 Characteristics of study participants

46 Baseline characteristics for all three cohorts (Danish AF cohort, GARFIELD Scandinavia, GARFIELD  
47 global) are shown on Table 1. Compared to GARFIELD Scandinavia, the Danish AF cohort had a  
48 more equal representation of men and women (54% vs 58%) and was older (median age 75 vs 73).  
49 There were also notable differences in comorbidities, in which diabetes, hypertension, and chronic  
50 kidney disease were less prevalent in the Danish AF cohort, whereas a history of bleeding (11.6% vs  
51 1.9% vs. 2.5%) was much more prevalent compared with the GARFIELD Scandinavia or global  
52 cohorts. Despite these differences the median CHA<sub>2</sub>DS<sub>2</sub>Vasc scores were comparable among all  
53  
54  
55  
56  
57  
58  
59  
60

1  
2  
3 cohorts but the HAS-BLED median was higher in the Danish AF cohort. For the GARFIELD model, the  
4 median GARFIELD scores were higher in the Danish AF cohort than both GARFIELD cohorts. The  
5 use of OAC therapy was 56.4% in the Danish AF cohort, which was lower than the reported  
6 percentages in GARFIELD Scandinavia (68.0%) and GARFIELD global (60.8%). The use of aspirin,  
7 ADP-inhibitors and NSAIDs was higher in the Danish AF cohort. The characteristics of patients at low  
8 (CHA<sub>2</sub>DS<sub>2</sub>Vasc of 0-1 in men and 1-2 in women; n=20,673) and high risk (n=70,020) for the Danish AF  
9 population is displayed in Table S3. The median [IQR] for CHA<sub>2</sub>DS<sub>2</sub>-VASc and HAS-BLED scores in  
10 the high-risk group were 4 [3-5] and 2 [2-3].  
11  
12  
13  
14  
15  
16  
17  
18  
19

### 20 Clinical outcomes at 1-year Follow-up

21  
22 Table 2 displays the number of stroke/SE, major bleeding, and all-cause mortality for the Danish AF  
23 cohort and GARFIELD-AF cohorts. For the Danish AF cohort, over a 1-year follow-up period a total of  
24 2,094 (2.3%) stroke/SE, 2,642 (2.9%) major bleedings were reported. Annual mortality rates were high  
25 with 10,915 deaths (12.0 per 100 person years). For the OAC treated patients there were 4,521  
26 deaths (8.8 per 100 person years) and for low risk patients there were 623 deaths (3.0 per 100 person  
27 years). For the GARFIELD-AF Global the rates of events were lower for stroke/SE (1.2%), major  
28 bleeding (1.1%), and deaths (4.7%). Similar rates the GARFIELD-AF Scandinavia the proportion of  
29 events were lower for stroke/SE (1.0%), major bleeding (1.7%), and deaths (3.7%). The cumulative  
30 incidence for ischemic stroke to 1-year for low and high-risk patients are presented in Figure S2 for the  
31 Danish AF cohort. The cumulative incidence of stroke/systemic embolism and ischemic stroke for the  
32 Danish AF cohort, GARFIELD Scandinavia, and GARFIELD Global can be found in Figure 1.  
33  
34  
35  
36  
37  
38  
39  
40  
41  
42  
43  
44

### 45 External validation of GARFIELD-AF model

46  
47 The C-index for the GARFIELD-AF model for 1-year stroke was 0.71 (95%-CI: 0.70-0.72) in the overall  
48 Danish AF cohort of 90,693 patients and 0.64 (95%-CI: 0.59-0.69) in low-risk patients not requiring  
49 OAC therapy (n=20,673). The C-index for the GARFIELD-AF model for 1-year major bleeding risk was  
50 0.64 (95%-CI 0.63-0.66) in patients using OAC therapy. The GARFIELD-AF model for stroke/SE and  
51 major bleeding scores were both well calibrated in the Danish AF cohort (Figure 2 and 3). The  
52 individual covariates in the GARFIELD-AF model expressed a similar regression coefficient for most  
53  
54  
55  
56  
57  
58  
59  
60



1  
2  
3 covariates in the Danish cohort when compared with the original derivation GARFIELD-AF cohort  
4  
5 (Table S4).  
6  
7

#### 8 GARFIELD-AF model versus CHA<sub>2</sub>DS<sub>2</sub>-VASc score for predicting stroke/SE

9  
10 The AUC curves for predicting stroke using the GARFIELD model and CHA<sub>2</sub>DS<sub>2</sub>-VASc scores are  
11 displayed in Figure 4A for the Danish AF cohort and Figure 4B for the low risk patients. The AUC and  
12 corresponding C-index for GARFIELD was significantly higher when compared with CHA<sub>2</sub>DS<sub>2</sub>Vasc for  
13 predicting stroke outcomes, in the overall cohort (C-index: 0.71, 95%-CI: 0.70-0.72 versus 0.67, 95%-  
14 CI: 0.66-0.68) as well as in low-risk patients (C-index: 0.62, 95%-CI: 0.59-0.69 versus 0.57, 95%-CI:  
15 0.53-0.61).  
16  
17  
18  
19  
20  
21  
22  
23

#### 24 GARFIELD-AF model versus HAS-BLED score for predicting major bleeding/haemorrhagic stroke

25  
26 Figure 4C illustrates the AUC curves for the prediction of major bleeding based on the GARFIELD and  
27 HAS-BLED scores in patients taking OAC therapy. The discriminatory value of GARFIELD was  
28 comparable with HAS-BLED: C-index: 0.64 (95%-CI: 0.63-0.66) versus C-index: 0.64 (95%-CI: 0.63-  
29 0.65), respectively.  
30  
31  
32

33 Table 3 displays available evidence comparing the discriminatory properties of various models for  
34 stroke/SE and major bleeding.  
35  
36  
37  
38

## 39 **Discussion**

40  
41  
42  
43 In a large unselected contemporary Danish AF cohort, our study demonstrates that the GARFIELD-AF  
44 model serves as a reliable risk stratification tool. We found that the GARFIELD-AF model surpasses  
45 the widely used CHA<sub>2</sub>DS<sub>2</sub>-VASc score in predicting the risk of stroke, both in high and low-risk  
46 patients. For predicting major bleeding, the three-item GARFIELD-AF model is on par with HAS-BLED  
47 among anticoagulated patients with AF.  
48  
49  
50  
51  
52  
53  
54

55 Risk-stratification of patients with AF is essential to mitigate the risk of stroke/SE when  
56 initiating anticoagulation therapy. As such, the easy-to-calculate CHA<sub>2</sub>DS<sub>2</sub>-VASc score serves as the  
57 risk-stratification tool recommended by international guidelines to commence therapy when the risk of  
58  
59  
60

1  
2  
3 stroke reaches a threshold of >2% per annum. [21] Prior studies have shown that guideline-adherent  
4 (risk-stratified) anticoagulation therapy is associated with a 60-70% reduction in thromboembolic  
5 associated complications and mortality. [22] Despite these reductions in stroke risk, there is still room  
6 for improvement in risk stratification of patients with AF and anticoagulation therapy. In this regard, the  
7 GARFIELD-AF model, which calculates the risk of stroke, death, and major bleeding, is promising,  
8 particularly as it performed better than the CHA<sub>2</sub>DS<sub>2</sub>-VASc and HAS-BLED. [11] The GARFIELD-AF  
9 model is not categorized into risk groups but instead provides risk prediction on a continuous scale  
10 and provides risk estimates of the risk of stroke/SE and bleeding (and mortality when blood pressure  
11 and heart rate data are available) in a single calculation and based on routinely collected data would  
12 have potentially wide clinical applications.  
13  
14  
15  
16  
17  
18  
19  
20  
21

22 Underuse of anticoagulation therapy is a well-known problem in particular in high-risk patients.  
23 [23] Our study found that 73.1% of patients with increased stroke risk (n=51,180, CHA<sub>2</sub>DS<sub>2</sub>-VASc>2 in  
24 women and >1 in men) received anticoagulation therapy. Studies suggests that treatment barriers are  
25 based on overestimation of bleeding risks (for example recurrent falls and prior peptic ulcers) and lack  
26 of reliable risk stratification tools and readily available information that does not rely on specific lab  
27 tests such as HAS-BLED. [9, 10, 23]  
28  
29  
30  
31  
32  
33  
34  
35

36 To provide predictions for bleeding risk, several bleeding scores have been developed, of which HAS-  
37 BLED has been most rigorously tested. [24, 25] While the HAS-BLED risk score is clinically useful to  
38 identify patients at high bleeding risk, it requires information that may not always be available in  
39 outpatient and primary care settings, such as information on liver function tests, INR status, and  
40 presence of anemia. This may be a limitation for the implementation of this score in low-resource  
41 settings and is of relevance as the majority (60%) of community-dwelling patients with AF are seen in  
42 primary care. [26, 27] Moreover, primary care physicians achieve lower anticoagulation rates  
43 compared with hospital-based physicians. [28, 29] While there are multiple reasons for these  
44 differences, which include differences in populations, with high percentage of (relative)  
45 contraindications (40-65%) and care-related factors, the lack of an integral decision tool impedes  
46 informed decisions on initiating or continuing antithrombotic therapy. [10, 30]  
47  
48  
49  
50  
51  
52  
53  
54  
55  
56

57 In the present study, the external validation show that GARFIELD-AF is well calibrated with  
58 the predicted risks, and the good calibration aligns well with the original GARFIELD-AF derivation  
59  
60

1  
2  
3 cohort. [11] GARFIELD-AF score has improved discriminatory abilities compared to CHA<sub>2</sub>DS<sub>2</sub>-VASc  
4 score in stroke prediction and on par with HAS-BLED for bleeding prediction. To our surprise, our  
5 external validation of GARFIELD-AF discriminatory c-index for stroke prediction was slightly higher  
6 (0.71) than the c-index in the original GARFIELD cohort (0.69). Furthermore, the Danish AF cohort  
7 were older with more stroke events than both GARFIELD cohorts and higher predicted risk than the  
8 GARFIELD cohorts. The opposite was the case for major bleeding prediction where the original  
9 GARFIELD cohort had better discriminatory abilities than HAS-BLED. The significant differences in the  
10 cohort characteristics, for example higher HAS-BLED and more use of combined OACs and  
11 antiplatelet therapy in the Danish AF cohort, and definitions of covariates and outcomes are likely to  
12 play a key role in both instances.

13  
14  
15  
16  
17  
18  
19  
20  
21  
22 The value of CHA<sub>2</sub>DS<sub>2</sub>-VASc score in defining patients with a truly low risk of stroke is  
23 uncertain, partly because the number of patients to accurately assess lower risk patients in the original  
24 studies was insufficient. [12, 31] The evaluation of the performance of risk scores in this low-risk  
25 category is important, as it determines the threshold when initiating antithrombotic therapy outweighs  
26 the risk of bleeding. In our study although both models had modest predictive discrimination for low  
27 risk patients, we found that in these patients the GARFIELD-AF model was well calibrated and  
28 provided a better prediction than CHA<sub>2</sub>DS<sub>2</sub>-VASc score in indicating which patients are truly at low-risk  
29 for subsequent stroke.

### 30 31 32 33 34 35 36 37 38 39 Limitations and future directions

40  
41 The primary limitation of this study is that definitions are based on administrative ICD-10 codes which  
42 are prone to non-systematic misclassification bias. Discrepancies exist between the GARFIELD-AF  
43 registry and the Danish registries in the definitions of comorbidities and clinical outcome data. This  
44 was most notable for major bleeding and stroke/SE events and CKD. In the Danish AF cohort,  
45 selected ICD-10 codes for bleeding hospitalizations were applied, whereas GARFIELD-AF applied the  
46 ISTH criteria for major bleeding, which are more restrictive. Apart from differences in disease  
47 definitions, the relative high number of bleeding and stroke/SE events in the Danish AF cohort could  
48 also be explained by site of enrollment (only hospital/outpatient). Similar data limitations apply to the  
49 construction of CHA<sub>2</sub>DS<sub>2</sub>-VASc score and HAS-BLED scores which was calculated from ICD-10 code  
50 usage although this study followed the standards set by other researchers using the same Danish  
51  
52  
53  
54  
55  
56  
57  
58  
59  
60

registries [17]. Specifically, we were unable to account for labile INR component of the HAS-BLED score. Another limitation was the inability to ascertain ethnicity status which is an integrated covariate of the GARFIELD-AF model. Therefore, we excluded immigrants to strengthen the assumption of European/Caucasian ethnicity in the cohort. The GARFIELD Scandinavian cohort consisted of 99.3% Caucasians. Population-based studies in other more ethnically diverse cohorts are warranted. We did not assess net reclassification improvement as this statistic is not appropriate when using it for point-based scores, such as CHA<sub>2</sub>DS<sub>2</sub>-VASc. [32] For the implementation of the GARFIELD-AF model, an online risk calculator already exists. A next step would be to provide an electronic health record integrated solution, in which stroke/SE and bleeding risks are automatically calculated when a patient is identified with AF. Doing so, would promote balanced and evidence-based decision making on anticoagulation therapy. Integrating the GARFIELD-AF model into electronic health records would also provide a way for anonymous monitoring of outcomes of patients in which the GARFIELD-AF model was applied, which can be used to further optimize risk prediction.

## Conclusion

The GARFIELD-AF model adequately predicted the risk of ischemic stroke/SE and major bleeding/haemorrhagic stroke in a nationwide Danish cohort of contemporary patients with non-valvular AF. Our external validation confirms that the performance of the GARFIELD-AF model was superior to CHA<sub>2</sub>DS<sub>2</sub>VASc in predicting stroke/SE both in high-risk and in low risk patients and comparable with HAS-BLED for predicting major bleeding. The GARFIELD-AF model holds an advantage over the existing risk scores as it permits for simultaneous evaluation of death, stroke and bleeding risks and uses readily available clinical parameters. As such, the tool may lead to more informed treatment decisions, improve monitoring for bleeding complications, and improve outcomes for patients treated for AF in the community.

## Acknowledgments

We would like to thank the investigators and participants involved in the GARFIELD-AF registry, Madhusudana Rao for programming support of GARFIELD-AF tables and Saverio Virdone for statistical support of GARFIELD-AF survival curves.

## References

1. Lloyd-Jones, D.M., et al., *Lifetime risk for development of atrial fibrillation: the Framingham Heart Study*. *Circulation*, 2004. **110**(9): p. 1042-6.
2. Odutayo, A., et al., *Atrial fibrillation and risks of cardiovascular disease, renal disease, and death: systematic review and meta-analysis*. *BMJ*, 2016. **354**: p. i4482.
3. Wolf, P.A., R.D. Abbott, and W.B. Kannel, *Atrial fibrillation as an independent risk factor for stroke: the Framingham Study*. *Stroke*, 1991. **22**(8): p. 983-8.
4. Hart, R.G., L.A. Pearce, and M.I. Aguilar, *Meta-analysis: antithrombotic therapy to prevent stroke in patients who have nonvalvular atrial fibrillation*. *Ann Intern Med*, 2007. **146**(12): p. 857-67.
5. Ruff, C.T., et al., *Comparison of the efficacy and safety of new oral anticoagulants with warfarin in patients with atrial fibrillation: a meta-analysis of randomised trials*. *Lancet*, 2014. **383**(9921): p. 955-62.
6. Cowan, C., et al., *The use of anticoagulants in the management of atrial fibrillation among general practices in England*. *Heart*, 2013. **99**(16): p. 1166-72.
7. Huisman, M.V., et al., *Antithrombotic Treatment Patterns in Patients with Newly Diagnosed Nonvalvular Atrial Fibrillation: The GLORIA-AF Registry, Phase II*. *Am J Med*, 2015. **128**(12): p. 1306-13 e1.
8. Wilke, T., et al., *Oral anticoagulation use by patients with atrial fibrillation in Germany. Adherence to guidelines, causes of anticoagulation under-use and its clinical outcomes, based on claims-data of 183,448 patients*. *Thromb Haemost*, 2012. **107**(6): p. 1053-65.
9. Cox, J.L., et al., *Optimizing primary care management of atrial fibrillation: The rationale and methods of the Integrated Management Program Advancing Community Treatment of Atrial Fibrillation (IMPACT-AF) study*. *Am Heart J*, 2018. **201**: p. 149-157.
10. van Doorn, S., et al., *Reasons for non-adherence to practice guidelines on stroke prevention in patients with atrial fibrillation: A cross-sectional study in primary care*. *Int J Cardiol*, 2015. **187**: p. 525-6.
11. Fox, K.A.A., et al., *Improved risk stratification of patients with atrial fibrillation: an integrated GARFIELD-AF tool for the prediction of mortality, stroke and bleed in patients with and without anticoagulation*. *BMJ Open*, 2017. **7**(12): p. e017157.
12. Lip, G.Y., et al., *Refining clinical risk stratification for predicting stroke and thromboembolism in atrial fibrillation using a novel risk factor-based approach: the euro heart survey on atrial fibrillation*. *Chest*, 2010. **137**(2): p. 263-72.
13. Pisters, R., et al., *A novel user-friendly score (HAS-BLED) to assess 1-year risk of major bleeding in patients with atrial fibrillation: the Euro Heart Survey*. *Chest*, 2010. **138**(5): p. 1093-100.
14. Collins, G.S., et al., *Transparent reporting of a multivariable prediction model for individual prognosis or diagnosis (TRIPOD): the TRIPOD statement*. *BMJ*, 2015. **350**: p. g7594.
15. Kakkar, A.K., et al., *International longitudinal registry of patients with atrial fibrillation at risk of stroke: Global Anticoagulant Registry in the FIELD (GARFIELD)*. *Am Heart J*, 2012. **163**(1): p. 13-19 e1.
16. Schmidt, M., et al., *The Danish National Patient Registry: a review of content, data quality, and research potential*. *Clin Epidemiol*, 2015. **7**: p. 449-90.
17. Olesen, J.B., et al., *Validation of risk stratification schemes for predicting stroke and thromboembolism in patients with atrial fibrillation: nationwide cohort study*. *BMJ*, 2011. **342**: p. d124.
18. van Rein, N., et al., *Major Bleeding Rates in Atrial Fibrillation Patients on Single, Dual, or Triple Antithrombotic Therapy*. *Circulation*, 2019. **139**(6): p. 775-786.
19. Schulman, S., et al., *Definition of major bleeding in clinical investigations of antihemostatic medicinal products in non-surgical patients*. *J Thromb Haemost*, 2005. **3**(4): p. 692-4.
20. DeLong, E.R., D.M. DeLong, and D.L. Clarke-Pearson, *Comparing the areas under two or more correlated receiver operating characteristic curves: a nonparametric approach*. *Biometrics*, 1988. **44**(3): p. 837-45.
21. Kirchhof, P., et al., *2016 ESC Guidelines for the management of atrial fibrillation developed in collaboration with EACTS*. *Eur Heart J*, 2016. **37**(38): p. 2893-2962.
22. Lip, G.Y., et al., *Improved outcomes with European Society of Cardiology guideline-adherent antithrombotic treatment in high-risk patients with atrial fibrillation: a report from the EORP-AF General Pilot Registry*. *Europace*, 2015. **17**(12): p. 1777-86.

23. Ogilvie, I.M., et al., *Underuse of oral anticoagulants in atrial fibrillation: a systematic review*. Am J Med, 2010. **123**(7): p. 638-645 e4.
24. Proietti, M., et al., *Predicting Bleeding Events in Anticoagulated Patients With Atrial Fibrillation: A Comparison Between the HAS-BLED and GARFIELD-AF Bleeding Scores*. J Am Heart Assoc, 2018. **7**(18): p. e009766.
25. Yao, X., et al., *Comparison of the CHA2DS2-VASc, CHADS2, HAS-BLED, ORBIT, and ATRIA Risk Scores in Predicting Non-Vitamin K Antagonist Oral Anticoagulants-Associated Bleeding in Patients With Atrial Fibrillation*. Am J Cardiol, 2017. **120**(9): p. 1549-1556.
26. Das, M., et al., *Primary Care Atrial Fibrillation Service: outcomes from consultant-led anticoagulation assessment clinics in the primary care setting in the UK*. BMJ Open, 2015. **5**(12): p. e009267.
27. Kirchhof, P., et al., *Management of patients with atrial fibrillation by primary-care physicians in Germany: 1-year results of the ATRIUM registry*. Clin Cardiol, 2014. **37**(5): p. 277-84.
28. Apenteng, P.N., et al., *Temporal trends in antithrombotic treatment of real-world UK patients with newly diagnosed atrial fibrillation: findings from the GARFIELD-AF registry*. BMJ Open, 2018. **8**(1): p. e018905.
29. Turakhia, M.P., et al., *Differences and trends in stroke prevention anticoagulation in primary care vs cardiology specialty management of new atrial fibrillation: The Retrospective Evaluation and Assessment of Therapies in AF (TREAT-AF) study*. Am Heart J, 2013. **165**(1): p. 93-101 e1.
30. Adderley, N., R. Ryan, and T. Marshall, *The role of contraindications in prescribing anticoagulants to patients with atrial fibrillation: a cross-sectional analysis of primary care data in the UK*. Br J Gen Pract, 2017. **67**(662): p. e588-e597.
31. Friberg, L., M. Skeppholm, and A. Terent, *Benefit of anticoagulation unlikely in patients with atrial fibrillation and a CHA2DS2-VASc score of 1*. J Am Coll Cardiol, 2015. **65**(3): p. 225-32.
32. Thomas, L.E., et al., *Application of net reclassification index to non-nested and point-based risk prediction models: a review*. Eur Heart J, 2019. **40**(23): p. 1880-1887.

#### Funding:

REH reports salary support from The Netherlands Organization for Scientific Research (NWO) through a RUBICON-grant to study bleeding risks associated with NOAC use. FD is funded by Danish Heart Foundation [Grant nr: 17-R115-A7443-22062] and Gangstedfonden [Grant nr. A35136] and reports travel grants from Knud Højgaard Fonden, Torben og Alice Frimodts Fond. KSP is funded by the Duke Clinical Research Institute.

#### Conflicts of interests:

KAAF: has received research grants Bayer/Janssen and AstraZeneca and Consulting/Fees Bayer, Sanofi/Regeneron and Verseon

FWAV: has received honoraria for consulting and presentations from Bayer HealthCare, Boehringer Ingelheim, BMSPfizer and Daiichi-Sankyo

GG: has ownership of stocks in Novo Nordisk Pharmaceuticals and reports research grants from Pfizer, Bristol Myers Squibb, Boehringer Ingelheim and Bayer.

1  
2  
3 CTP: declares grants for studies from Bayer.  
4

5 Other authors have no conflicts of interest to declare  
6  
7

8  
9 Patient consent:

10 Obtained  
11  
12

13  
14 Ethics approval:

15  
16 For the GARFIELD-AF registry an independent ethics committee and hospital-based institutional  
17 review board approvals were obtained for the registry protocol. In Denmark, retrospective register  
18 studies do not require approval from the ethics committees. The Danish Data Protection Agency  
19 approved this study (Ref no: 2007-58-0015, I-Suite nr: 02732, GEH-2014-014). Data were made  
20 available in an anonymized format such that specific individuals could not be identified.  
21  
22  
23  
24  
25

26  
27  
28 Contributors:

29 FD, REH, MR, FWAV, KAAF, AKK, HVW and KP contributed to the study concept and design; FD,  
30 and KP conducted the data analysis; REH and FD and drafted the manuscript; FD, REH, MR, FWAV,  
31 KAAF, AKK, HVW JC, JLP, PVR, TBL, CTP, GG critically reviewed all drafts of the manuscript.  
32  
33  
34  
35  
36  
37  
38

39 Data sharing statement:  
40

41  
42 Due to restrictions related to Danish law and protecting patient privacy, the combined set of data as  
43 used in this study can only be made available through a trusted third party, Statistics Denmark. This  
44 state organisation holds the data used for this study. Any request on data access should be addressed  
45 to Statistics Denmark <https://www.dst.dk/en.aspx#>  
46  
47  
48  
49  
50  
51  
52  
53  
54  
55  
56  
57  
58  
59  
60

**Table 1.** Baseline characteristics of patients from the Danish AF cohort, GARFIELD-AF Scandinavia, and GARFIELD-AF Global registries

|                            | <b>Danish AF cohort</b> | <b>GARFIELD-AF Scandinavia</b> | <b>GARFIELD-AF Global</b> |
|----------------------------|-------------------------|--------------------------------|---------------------------|
| n                          | 90693                   | 2396                           | 52080                     |
| Age (median [IQR])         | 75 [66.0, 83.0]         | 73.0 [66.0, 78.0]              | 71.0 [63.0, 78.0]         |
| Sex, male (%)              | 48486 (53.5)            | 1389 (58.0)                    | 29068 (55.8)              |
| Race, Caucasian (%)        | NA                      | 1860 (99.3)                    | 32028 (63.1)              |
| Diabetes (%)               | 10900 (12.0)            | 387 (16.2)                     | 11555 (22.2)              |
| Stroke/TIA (%)             | 12827 (14.1)            | 325 (13.6)                     | 3879 (7.5)                |
| Systemic embolism (%)      | 448 (0.5)               | 6 (0.3)                        | 335 (0.6)                 |
| History of bleeding (%)    | 10544 (11.6)            | 46 (1.9)                       | 1318 (2.5)                |
| Vascular disease (%)       | 15305 (16.9)            | 268 (11.2)                     | 7682 (14.8)               |
| Chronic kidney disease (%) | 4224 (4.7)              | 185 (7.7)                      | 5360 (10.3)               |
| Heart Failure (%)          | 14961 (16.5)            | 348 (14.5)                     | 11758 (22.6)              |
| Ischemic heart disease (%) | 13445 (14.8)            | 331 (13.8)                     | 11265 (21.6)              |
| Hypertension (%)           | 55665 (61.4)            | 1659 (69.4)                    | 39643 (76.3)              |
| VTE or PE (%)              | 5141 (5.7)              | 77 (3.2)                       | 1355 (2.6)                |
| NOAC (%)                   | 23212 (25.6)            | 521 (21.7)                     | 11004 (21.1)              |
| VKA (%)                    | 27968 (30.8)            | 1110 (46.3)                    | 20708 (39.8)              |
| OAC (%)                    | 51180 (56.4)            | 1631 (68.0)                    | 31712 (60.8)              |
| VKA + AP (%)               | 10773 (11.9)            | 181 (7.6)                      | 4827 (9.4)                |
| NOAC + AP (%)              | 7608 (8.4)              | 47 (2.0)                       | 1896 (3.7)                |
| NSAID (%)                  | 13078 (14.4)            | 23 (1.0)                       | 1701 (3.3)                |
| Acetylsalicylic acid (%)   | 32890 (36.3)            | 413 (17.2)                     | 14636 (28.1)              |



|                                                         |                   |                   |                            |
|---------------------------------------------------------|-------------------|-------------------|----------------------------|
| ADP-inhibitor (%)                                       | 9128 (10.1)       | 89 (3.7)          | 3580 (6.9)                 |
| CABG (%)                                                | 3291 (3.6)        | 92 (3.9)          | 1625 (3.2)                 |
| CHA <sub>2</sub> DS <sub>2</sub> VASC<br>(median [IQR]) | 3.0 [2.0, 4.0]    | 3.0 [2.0, 4.0]    | 3.0 [2.0, 4.0]             |
| CHA <sub>2</sub> DS <sub>2</sub> VASC (%)               |                   |                   |                            |
| 0                                                       | 5678 (6.3)        | 19 (0.8)          | 1516 (2.9)                 |
| 1                                                       | 10231 (11.3)      | 279 (11.7)        | 6369 (12.4)                |
| 2                                                       | 16137 (17.8)      | 530 (22.2)        | 10230 (19.9)               |
| 3                                                       | 20143 (22.2)      | 626 (26.2)        | 12138 (23.6)               |
| 4                                                       | 19378 (21.4)      | 526 (22.1)        | 11022 (21.4)               |
| 5                                                       | 11020 (12.2)      | 238 (10.0)        | 5895 (11.5)                |
| >5                                                      | 8106 (8.9)        | 167 (7.0)         | 4238 (8.2)                 |
| HAS-BLED (median<br>[IQR])                              | 2.0 [1.0, 3.0]    | 1.0 [1.0, 2.0]    | 1.0 [1.0, 2.0]             |
| HAS-BLED category<br>n, missing (%)                     |                   | 1088 (1308)       | 37549 (14531 -<br>missing) |
| 0                                                       | 8297 (9.1)        | 169 (15.5)        | 5471 (14.6)                |
| 1                                                       | 19956 (22.0)      | 507 (46.6)        | 16169 (43.1)               |
| 2                                                       | 31170 (34.4)      | 301 (27.7)        | 11692 (31.1)               |
| 3                                                       | 24998 (27.6)      | 87 (8.0)          | 3570 (9.5)                 |
| >3                                                      | 6272 (6.9)        | 24 (2.2)          | 647 (1.7)                  |
| GARFIELD-AF model,<br>stroke, median (IQR)              | 1.10 [0.75, 1.82] | 0.80 [0.60, 1.10] | 0.90 [0.70-1.40]           |
| GARFIELD-AF model,<br>bleed, median (IQR)               | 1.08 [0.74, 1.54] | 0.90 [0.70,1.30]  | 1.00 [0.70-1.40]           |

Table 1 footnotes. Abbreviations: TIA; transient ischemic attack, SE; systemic embolism, OAC; oral anticoagulants, NOAC; non-vitamin-K antagonist, VKA; vitamin-K antagonist; AP; anti-platelet therapy, NSAID; non-steroidal anti-inflammatory drug, ADP; adenosine diphosphate, CABG; Coronary Artery Bypass Grafting.

1  
2  
3  
4  
5  
6  
7  
8  
9  
10  
11  
12  
13  
14  
15  
16  
17  
18  
19  
20  
21  
22  
23  
24  
25  
26  
27  
28  
29  
30  
31  
32  
33  
34  
35  
36  
37  
38  
39  
40  
41  
42  
43  
44  
45  
46  
47  
48  
49  
50  
51  
52  
53  
54  
55  
56  
57  
58  
59  
60

For peer review only

**Table 2.** Number of events and deaths for one 1-year follow-up in the Danish population (all patients, patients on OAC, low risk patients), GARFIELD-AF Global, and GARFIELD-AF Scandinavia.

|                                    | Danish AF cohort<br>(n=90693) | Patients treated with OAC<br>(n=51180) | Low risk patients<br>(n=20673) | GARFIELD Scandinavia<br>(n=2396) | GARFIELD-AF Global<br>(n=52080) |
|------------------------------------|-------------------------------|----------------------------------------|--------------------------------|----------------------------------|---------------------------------|
| Ischemic Stroke/SE                 | 2094                          | 994                                    | 139                            | 24                               | 599                             |
| Major bleeding/Haemorrhagic stroke | 2642                          | 1492                                   | 242                            | 28*                              | 341□                            |
| Deaths                             | 10915                         | 4521                                   | 623                            | 88                               | 2459                            |

Table 2 footnotes. Low risk patients were defined as CHA<sub>2</sub>DS<sub>2</sub>-VASc score ( $\leq 2$  for women, 0-1 for men and  $>2$  for women and  $>1$  for men). Abbreviations: OAC; oral anticoagulation. \*Of those treated with OAC (n=1631), □Of those treated with OAC (n=31712).

**Table 3.** Available evidence comparing the discriminatory properties of various models for stroke/SE and major bleeding [11, 24]

| Outcome                     | Cohort           | N      | GARFIELD-AF -<br>AUC (95% CI) | CHA <sub>2</sub> DS <sub>2</sub> -VASc<br>/HAS-BLED -<br>AUC (95% CI) |
|-----------------------------|------------------|--------|-------------------------------|-----------------------------------------------------------------------|
| Stroke/SE                   | GARFIELD-AF      | 39,898 | 0.69 (0.67-0.71)              | 0.64 (0.61-0.66)                                                      |
|                             | ORBIT-AF         | 9,743  | 0.69 (0.64-0.75)              | 0.69 (0.64-0.74)                                                      |
|                             | Danish AF cohort | 90,693 | 0.71 (0.70-0.72)              | 0.67 (0.66-0.68)                                                      |
| Stroke/SE low risk patients | GARFIELD-AF      | 7,882  | 0.65 (0.56-0.73)              | 0.59 (0.50-0.67)                                                      |
|                             | Danish AF cohort | 20,673 | 0.64 (0.59-0.69)              | 0.57 (0.53-0.61)                                                      |
| Major bleeding              | GARFIELD-AF      | 25,677 | 0.66 (0.62-0.69)              | 0.64 (0.61-0.68)                                                      |
|                             | ORBIT-AF         | 7,442  | 0.61 (0.58-0.64)              | -                                                                     |
|                             | SPORTIF III-V    | 3,550  | 0.56 (0.54-0.57)              | 0.58 (0.56-0.60)                                                      |

1  
2  
3  
4  
5  
6  
7  
8  
9  
10  
11  
12  
13  
14  
15  
16  
17  
18  
19  
20  
21  
22  
23  
24  
25  
26  
27  
28  
29  
30  
31  
32  
33  
34  
35  
36  
37  
38  
39  
40  
41  
42  
43  
44  
45  
46  
47  
48  
49  
50  
51  
52  
53  
54  
55  
56  
57  
58  
59  
60

|  |                  |        |                  |                  |
|--|------------------|--------|------------------|------------------|
|  | Danish AF cohort | 51,180 | 0.64 (0.63-0.66) | 0.64 (0.63-0.65) |
|--|------------------|--------|------------------|------------------|

For peer review only

**Figure 1.**

*Figure 1 legend.* Cumulative incidence of stroke/systemic embolism (panel A) and major bleeding (panel B) in the Danish AF cohort, GARFIELD-AF Scandinavia, and GARFIELD-AF Global.

**Figure 2.**

*Figure 2 legend.* Calibration plots of GARFIELD-AF model and stroke/SE risk in overall Danish population (A) and in low-risk patients (B). Predicted probability for GARFIELD (blackline), and actual observed cumulative incidence estimates with 95% CI for each GARFIELD score in deciles including a linear regression model (dashed line) and LOESS function of observed probability (red line).

**Figure 3.**

*Figure 3 legend.* Calibration plots of GARFIELD-AF model and major bleeding risk in Danish population. Predicted probability for GARFIELD (blackline), and actual observed cumulative incidence estimates with 95% CI for each GARFIELD score in deciles including a linear regression model (dashed line) and LOESS function of observed probability (red line).

**Figure 4.**

*Figure 4 legend.* Receiver Operating Characteristic curves of GARFIELD-AF model versus CHA<sub>2</sub>DS<sub>2</sub>VASc scores for predicting stroke in (A) the Danish AF cohort and (B) low-risk individuals and (C) GARFIELD-AF model versus HAS-BLED scores for predicting major bleeding in the Danish AF cohort in those receiving oral anticoagulants (n=51,180). Low risk stroke patients were defined as CHA<sub>2</sub>DS<sub>2</sub>-VASc score ( $\leq 2$  for women, 0-1 for men and  $> 2$  for women and  $> 1$  for men).

1  
2  
3  
4  
5  
6  
7  
8  
9  
10  
11  
12  
13  
14  
15  
16  
17  
18  
19  
20  
21  
22  
23  
24  
25  
26  
27  
28  
29  
30  
31  
32  
33  
34  
35  
36  
37  
38  
39  
40  
41  
42  
43  
44  
45  
46  
47  
48  
49  
50  
51  
52  
53  
54  
55  
56  
57  
58  
59  
60

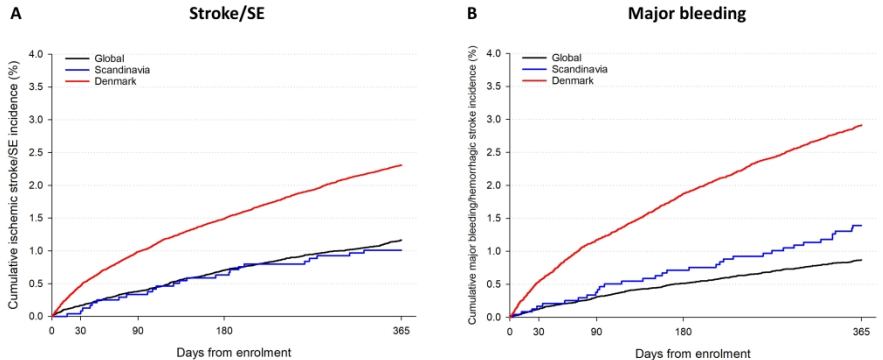

Cumulative incidence of stroke/systemic embolism (panel A) and major bleeding (panel B) in the Danish AF cohort, GARFIELD-AF Scandinavia, and GARFIELD-AF Global.

338x190mm (300 x 300 DPI)

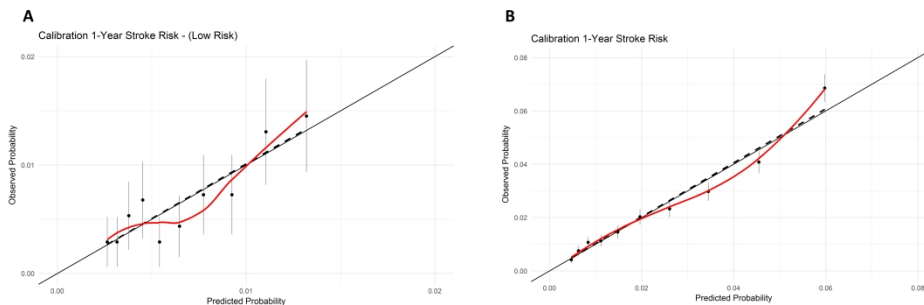

Calibration plots of GARFIELD-AF model and stroke/SE risk in overall Danish population (A) and in low-risk patients (B). Predicted probability for GARFIELD (blackline), and actual observed cumulative incidence estimates with 95% CI for each GARFIELD score in deciles including a linear regression model (dashed line) and LOESS function of observed probability (red line).

350x170mm (300 x 300 DPI)

1  
2  
3  
4  
5  
6  
7  
8  
9  
10  
11  
12  
13  
14  
15  
16  
17  
18  
19  
20  
21  
22  
23  
24  
25  
26  
27  
28  
29  
30  
31  
32  
33  
34  
35  
36  
37  
38  
39  
40  
41  
42  
43  
44  
45  
46  
47  
48  
49  
50  
51  
52  
53  
54  
55  
56  
57  
58  
59  
60

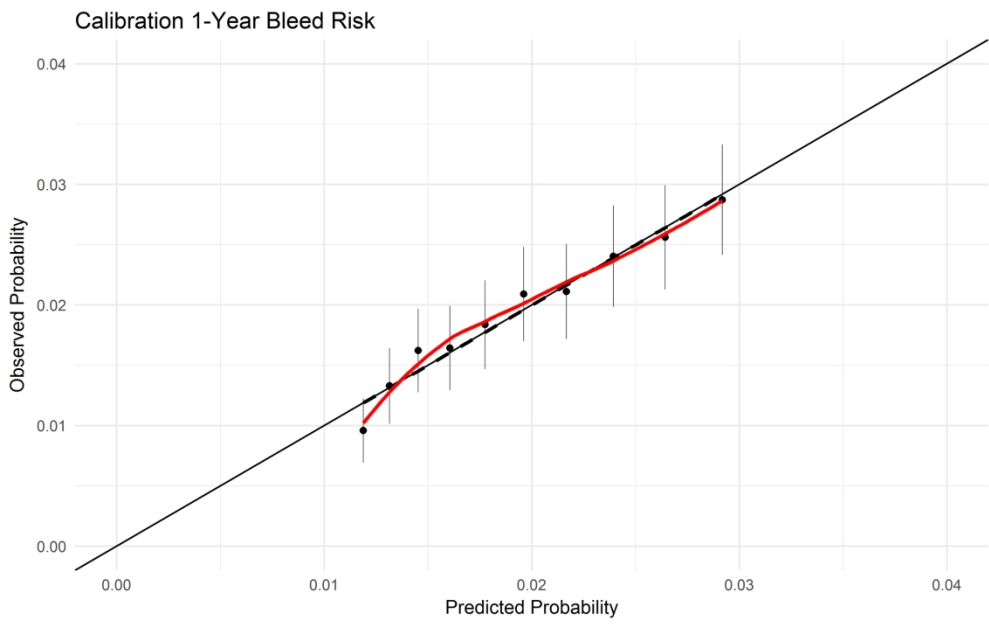

Predicted probability for GARFIELD (blackline), and actual observed cumulative incidence estimates with 95% CI for each GARFIELD score in deciles including a linear regression model (dashed line) and LOESS function of observed probability (red line).

203x127mm (300 x 300 DPI)



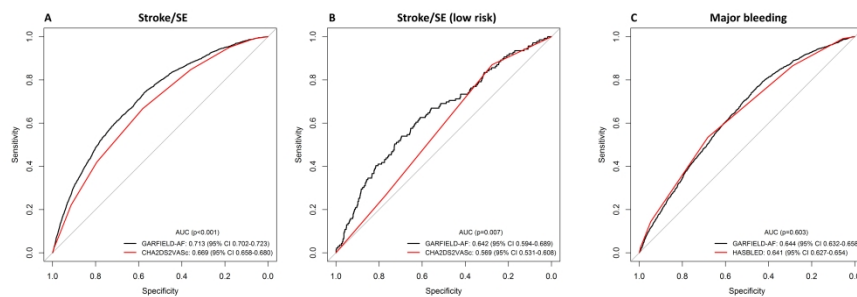

Receiver Operating Characteristic curves of GARFIELD-AF model versus CHA2DS2VASc scores for predicting stroke in (A) the Danish AF cohort and (B) low-risk individuals and (C) GARFIELD-AF model versus HAS-BLED scores for predicting major bleeding in the Danish AF cohort in those receiving oral anticoagulants (n=51,180). Low risk stroke patients were defined as CHA2DS2-VASc score ( $\leq 2$  for women, 0-1 for men and  $> 2$  for women and  $> 1$  for men).

520x180mm (300 x 300 DPI)

## SUPPLEMENTAL DATA FILE

Table S1. Equations of the risk scores

|                                                       |                                                                                                                                                                                                                                                                                                                             |
|-------------------------------------------------------|-----------------------------------------------------------------------------------------------------------------------------------------------------------------------------------------------------------------------------------------------------------------------------------------------------------------------------|
| GARFIELD-AF stroke/SE<br>(original)                   | $100 * (1 - (0.991344397^{**} (\exp(0.0304823 * (\text{Age} - 60) + 0.952524717 * \text{stroke/TIA/SE} + 0.432357326 * \text{Bleeding} + 0.319129628 * \text{Heart failure} + 0.574919171 * \text{Chronic kidney disease} + 0.654249546 * \text{other region} + 0.671380382 * \text{race} - 0.582045773 * \text{OAC}))))))$ |
| GARFIELD-AF stroke/SE<br>(modified for this analysis) | $100 * (1 - (0.991344397^{**} (\exp(0.0304823 * (\text{Age} - 60) + 0.952524717 * \text{stroke/TIA/SE} + 0.432357326 * \text{Bleeding} + 0.319129628 * \text{Heart failure} + 0.574919171 * \text{Chronic kidney disease} - 0.582045773 * \text{OAC}))))))$                                                                 |
| GARFIELD-AF major bleeding                            | $100 * (1 - (0.994488926^{**} (\exp(0.0389958 * (\text{AGE} - 60) + 0.515013074 * \text{vascular disease} + 0.577378429 * \text{Chronic kidney disease}))))))$                                                                                                                                                              |
| CHA <sub>2</sub> DS <sub>2</sub> -VASc                | <p>65 ≤ age &lt; 75: 1 point</p> <p>Age ≥ 75: 2 point</p> <p>Female sex: 1 point</p> <p>Heart failure: 1 point</p> <p>Hypertension: 1 point</p> <p>Ischemic stroke / TCI / Systemic embolism and thrombosis: 2 points</p> <p>Ischemic Heart Disease or Peripheral atherosclerosis: 1 point</p> <p>Diabetes: 1 point</p>     |
| HAS-BLED                                              | <p>Age &gt; 65: 1 point</p> <p>Hypertension: 1 point</p> <p>Chronic kidney disease: 1 point</p> <p>Liver disease: 1 point</p> <p>Ischemic stroke / TCI / Systemic embolism and thrombosis: 1</p>                                                                                                                            |

|  |                                                         |
|--|---------------------------------------------------------|
|  | points                                                  |
|  | Bleeding: 1 point                                       |
|  | ASA or ADP inhibitors or Dipyridamole or NSAID: 1 point |
|  | Alcohol: 1 point                                        |

For peer review only

**Table S2.** Definitions of covariates.

|                                                                                        | ICD-10 codes                                                                                                                                                                                                                                                                                                                                                                                                                                                                                       |
|----------------------------------------------------------------------------------------|----------------------------------------------------------------------------------------------------------------------------------------------------------------------------------------------------------------------------------------------------------------------------------------------------------------------------------------------------------------------------------------------------------------------------------------------------------------------------------------------------|
| Atrial Fibrillation                                                                    | I48                                                                                                                                                                                                                                                                                                                                                                                                                                                                                                |
| Non-Valvular Atrial Fibrillation                                                       | Presence of: I48<br>With absence of:<br>Rheumatic heart valve disease, prostatic heart valve                                                                                                                                                                                                                                                                                                                                                                                                       |
| Rheumatic heart valve disease                                                          | ICD10: Z952, Z954, I05, I06, I080A, I081A, I082A, I083A                                                                                                                                                                                                                                                                                                                                                                                                                                            |
| Prostatic heart valve                                                                  | KFKD, KFKH, KFMD, KFMH, KFGE, KFJF                                                                                                                                                                                                                                                                                                                                                                                                                                                                 |
| Stroke / TIA / Systemic embolism and thrombosis (without hemorrhagic stroke), baseline | Ischemic: I63, I64<br>TIA: G458, G459<br>Systemic embolism and thrombosis: I74                                                                                                                                                                                                                                                                                                                                                                                                                     |
| Stroke/SE, endpoint                                                                    | Ischemic: I63, I64<br>Systemic embolism and thrombosis: I74                                                                                                                                                                                                                                                                                                                                                                                                                                        |
| Hospitalization for any bleeding, baseline                                             | Heart: I312<br>Urine: N02, R31<br>Airways: R04<br>Eye: H313, H356, H431, H450, H052A<br>Gastrointestinal: K228F, K250, K252, K254, K256, K260, K262, K264, K266, K270, K272, K274, K276, K280, K282, K284, K286, K290, K298A, K625, K638B, K638C, K838F, K868G, K920, K921, K922, I850, I864A<br>Intra-dural bleeds not hemorrhagic stroke: S064, S065, S066<br>Hemorrhagic stroke: I60, I61, I62, I690, I691, I692<br>Retro-peritoneal: K661<br>Thorax: J942<br>Anemia due to bleeding: D500, D62 |
| Major bleeding (with hemorrhagic stroke)                                               | Heart: I312<br>Urine; N02, R31<br>Eye: H313, H356, H431, H450<br>Airways: R04<br>Gastrointestinal: K250, K252, K254, K256, K260, K262, K264, K266, K270, K272, K280, K282, K284, K286, K920, K921, K922<br>Intra-dural bleeds not hemorrhagic stroke: S064, S065, S066, I692<br>Hemorrhagic stroke: I60, I61, I62, I690, I691<br>Thorax: J942<br>Retro-peritoneal: K661                                                                                                                            |

|                                                                                                             |                                                                                                                                                                                                                                                                                                                                                                                     |
|-------------------------------------------------------------------------------------------------------------|-------------------------------------------------------------------------------------------------------------------------------------------------------------------------------------------------------------------------------------------------------------------------------------------------------------------------------------------------------------------------------------|
|                                                                                                             | Anemia due to bleeding: D62                                                                                                                                                                                                                                                                                                                                                         |
| Heart Failure                                                                                               | Cardiomyopathy: I42<br>Heart failure: I50, I110<br>Lung edema: J81                                                                                                                                                                                                                                                                                                                  |
| IHD                                                                                                         | Ischemic Heart Disease: I20-I25 <ul style="list-style-type: none"> <li>• Angina pectoris: I20</li> <li>• Acute myocardial infarction: I21, I22</li> <li>• Complications to AMI: I23,</li> <li>• Other forms of ischemic heart disease: I24, I25</li> </ul>                                                                                                                          |
| Peripheral artery disease                                                                                   | I70                                                                                                                                                                                                                                                                                                                                                                                 |
| Vascular disease                                                                                            | Presence of Ischemic heart disease or peripheral artery disease                                                                                                                                                                                                                                                                                                                     |
| Chronic Kidney Disease                                                                                      | N02, N03, N04, N05, N06, N07, N08, N11, N12, N14, N18, N19, N26, N158, N159, N160, N162, N163, N164, N168<br>Q61,<br>E102, E112, E132, E142,<br>I120,<br>M321B                                                                                                                                                                                                                      |
| Pulmonary embolism                                                                                          | I26                                                                                                                                                                                                                                                                                                                                                                                 |
| Alcohol                                                                                                     | F10, K70, E52, T51, K860, E244, G312, I426, O354, Z714, Z721, G621, G721, K292, L278A                                                                                                                                                                                                                                                                                               |
| Liver disease                                                                                               | B15, B16, B17, B18, B19, C22, K70, K71, K72, K73, K74, K75, K76, K77, Z944, I982, D684C                                                                                                                                                                                                                                                                                             |
| Diabetes Mellitus                                                                                           | Insulin: A10A<br>Non-Insulin: A10B                                                                                                                                                                                                                                                                                                                                                  |
| OAC                                                                                                         | VKA: Warfarin: B01AA03, Phenprocoumon: B01AA04<br>NOAC: Dabigatran: B01AE07, Rivaroxaban: B01AF01, Apixaban: B01AF02                                                                                                                                                                                                                                                                |
| Acetylsalicylic acid                                                                                        | B01AC06, N02BA01                                                                                                                                                                                                                                                                                                                                                                    |
| ADP-inhibitors                                                                                              | B01AC04, B01AC24, B10AC22                                                                                                                                                                                                                                                                                                                                                           |
| NSAID                                                                                                       | M01A without M01AX05                                                                                                                                                                                                                                                                                                                                                                |
| Hypertension as usage of combination of at least two of the seven different drugs classes at the same time. | <ol style="list-style-type: none"> <li>1. Non-Loop:<br/>Thiazides C02L, C02DA, C07B, C07D, C09XA52, C03A, C03EA;<br/>Low-ceiling diuretics (excl. thiazides): C03B, C03X, C07C, C08G, C09BA, C09DA; Potassium-sparing agents (spiron): C03D, C03E, C03EB</li> <li>2. Loop: High-ceiling diuretics (Loop) C03C, C03EB</li> <li>3. Antiadrenergic agents: C02A, C02B, C02C</li> </ol> |

1  
2  
3  
4  
5  
6  
7  
8  
9  
10  
11  
12  
13  
14  
15  
16  
17  
18  
19  
20  
21  
22  
23  
24  
25  
26  
27  
28  
29  
30  
31  
32  
33  
34  
35  
36  
37  
38  
39  
40  
41  
42  
43  
44  
45  
46  
47  
48  
49  
50  
51  
52  
53  
54  
55  
56  
57  
58  
59  
60

|  |                                                                                                                                                                                                                                                                                |
|--|--------------------------------------------------------------------------------------------------------------------------------------------------------------------------------------------------------------------------------------------------------------------------------|
|  | <ul style="list-style-type: none"><li>4. Beta-blockers: C07A, C07B, C07C, C07D, C07F</li><li>5. Vasodilators: C02DB, C02DD, C02DG</li><li>6. Calcium channel blockers: C08, C09BB, C09DB</li><li>7. RASi: C09AA, C09BA, C09BB, C09CA, C09DA, C09DB, C09XA02, C09XA52</li></ul> |
|--|--------------------------------------------------------------------------------------------------------------------------------------------------------------------------------------------------------------------------------------------------------------------------------|

For peer review only

**Table S3.** Baseline characteristics for the Danish population, stratified by CHA<sub>2</sub>DS<sub>2</sub>VASC score. Low (0-1 men, 1-2 women) risk and high-risk.

|                                                      | Low risk       | High risk      |
|------------------------------------------------------|----------------|----------------|
| n                                                    | 20,673         | 70,020         |
| age (median [IQR])                                   | 61 [54, 68]    | 78 [71, 85]    |
| Sex, male (%)                                        | 13083 (63.3)   | 35403 (50.6)   |
| Diabetes (%)                                         | 286 (1.4)      | 10614 (15.2)   |
| Stroke/TIA (%)                                       | 0 (0.0)        | 12827 (18.3)   |
| Systemic embolism (%)                                | 0 (0.0)        | 448 (0.6)      |
| History of bleeding (%)                              | 1154 (5.6)     | 9176 (13.1)    |
| Chronic kidney disease (%)                           | 296 (1.4)      | 3928 (5.6)     |
| Heart failure (%)                                    | 225 (1.1)      | 14736 (21.0)   |
| Ischemic heart disease (%)                           | 492 (2.4)      | 12953 (18.5)   |
| OAC (%)                                              | 8801 (42.6)    | 42379 (60.5)   |
| NOAC (%)                                             | 4307 (20.8)    | 18905 (27.0)   |
| VKA (%)                                              | 4494 (21.7)    | 23474 (33.5)   |
| venous thromboembolism (%)                           | 380 (1.8)      | 2301 (3.3)     |
| Pulmonary embolism (%)                               | 0 (0.0)        | 2460 (3.5)     |
| Dipyridamole (%)                                     | 78 (0.4)       | 2629 (3.8)     |
| Hypertension (%)                                     | 3601 (17.4)    | 52064 (74.4)   |
| NSAID (%)                                            | 3113 (15.1)    | 9965 (14.2)    |
| Acetylsalicylic acid (%)                             | 3685 (17.8)    | 29205 (41.7)   |
| ADP-inhibitor (%)                                    | 335 (1.6)      | 8793 (12.6)    |
| PCI (%)                                              | 252 (1.2)      | 6104 (8.7)     |
| CABG (%)                                             | 109 (0.5)      | 3182 (4.5)     |
| CHA <sub>2</sub> DS <sub>2</sub> VASC (median [IQR]) | 1.0 [0.0, 1.0] | 4.0 [3.0, 5.0] |
| CHA <sub>2</sub> DS <sub>2</sub> VASC (%)            |                |                |
| 0                                                    | 5678 (27.5)    | -              |

|                                   |                   |                   |
|-----------------------------------|-------------------|-------------------|
| 1                                 | 10231 (49.5)      | -                 |
| 2                                 | 4764 (23.0)       | 11373 (16.2)      |
| 3                                 | -                 | 20143 (28.8)      |
| 4                                 | -                 | 19378 (27.7)      |
| 5                                 | -                 | 11020 (15.7)      |
| >5                                | -                 | 8106 (11.6)       |
| HAS-BLED (median [IQR])           | 1.0 [0.0, 1.0]    | 2.0 [2.0, 3.0]    |
| HAS-BLED category (%)             |                   |                   |
| 0                                 | 7844 (37.9)       | 453 (0.6)         |
| 1                                 | 9297 (45.0)       | 10659 (15.2)      |
| 2                                 | 3083 (14.9)       | 28087 (40.1)      |
| 3                                 | 400 (1.9)         | 24598 (35.1)      |
| >3                                | 49 (0.2)          | 6223 (8.9)        |
| GARFIELD-AF stroke (median [IQR]) | 0.68 [0.52, 0.94] | 1.33 [0.89, 2.09] |
| GARFIELD-AF, bleed (median [IQR]) | 0.59 [0.44, 0.76] | 1.27 [0.95, 1.69] |

Table S3 footnotes. Abbreviations. TIA; transient ischemic attack, SE; systemic embolism, OAC; oral anticoagulants, NOAC; non-vitamin-K antagonist, VKA; vitamin-K antagonist; NSAID; non-steroidal anti-inflammatory drug, ADP; adenosine diphosphate, PCI; Percutaneous coronary intervention, CABG; Coronary Artery Bypass Grafting.



**Table S4.** Logistic regression coefficients of GARFIELD-AF model for stroke/SE and major bleeding in the GARFIELD-AF Global cohort and the Danish AF cohort.

| Variable               | GARFIELD-AF Global registry | Danish AF cohort | P value* |
|------------------------|-----------------------------|------------------|----------|
| <b>Stroke/SE</b>       |                             |                  |          |
| Age                    | 0.030                       | 0.026            | <0.001   |
| Prior Stroke/SE        | 0.952                       | 1.572            | <0.001   |
| Bleeding               | 0.432                       | 0.191            | 0.001    |
| Heart failure          | 0.319                       | 0.065            | 0.269    |
| Chronic kidney disease | 0.574                       | 0.091            | 0.332    |
| OAC                    | -0.582                      | -0.396           | <0.001   |
| <b>Major bleeding</b>  |                             |                  |          |
| Age                    | 0.039                       | 0.041            | <0.001   |
| Vascular disease       | 0.515                       | 0.363            | <0.001   |
| Chronic kidney disease | 0.577                       | 0.865            | <0.001   |

Table S4 footnotes. Abbreviations. SE; systemic embolism, OAC; oral anticoagulant.

\* P value for coefficients in the Danish AF cohort

Figure S1. Flowchart of study population



only

**Figure S2.** Cumulative incidence of ischemic stroke in the Danish population stratified by low and high stroke risk

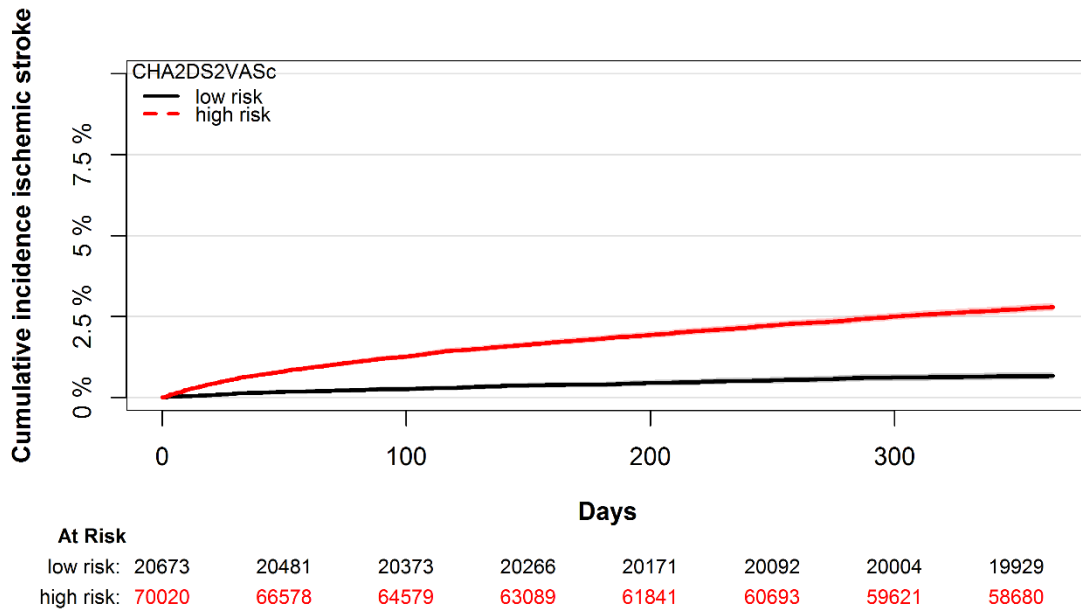

**Figure S2 legend.** Low risk patients were defined as CHA<sub>2</sub>DS<sub>2</sub>-VASc score ( $\leq 2$  for women, 0-1 for men and  $> 2$  for women and  $> 1$  for men).

Review only

## TRIPOD Checklist: Prediction Model Validation

| Section/Topic                | Item | Checklist Item                                                                                                                                                                                        | Page  |
|------------------------------|------|-------------------------------------------------------------------------------------------------------------------------------------------------------------------------------------------------------|-------|
| <b>Title and abstract</b>    |      |                                                                                                                                                                                                       |       |
| Title                        | 1    | Identify the study as developing and/or validating a multivariable prediction model, the target population, and the outcome to be predicted.                                                          | 1     |
| Abstract                     | 2    | Provide a summary of objectives, study design, setting, participants, sample size, predictors, outcome, statistical analysis, results, and conclusions.                                               | 2     |
| <b>Introduction</b>          |      |                                                                                                                                                                                                       |       |
| Background and objectives    | 3a   | Explain the medical context (including whether diagnostic or prognostic) and rationale for developing or validating the multivariable prediction model, including references to existing models.      | 4     |
|                              | 3b   | Specify the objectives, including whether the study describes the development or validation of the model or both.                                                                                     | 4     |
| <b>Methods</b>               |      |                                                                                                                                                                                                       |       |
| Source of data               | 4a   | Describe the study design or source of data (e.g., randomized trial, cohort, or registry data), separately for the development and validation data sets, if applicable.                               | 5     |
|                              | 4b   | Specify the key study dates, including start of accrual; end of accrual; and, if applicable, end of follow-up.                                                                                        | 5     |
| Participants                 | 5a   | Specify key elements of the study setting (e.g., primary care, secondary care, general population) including number and location of centres.                                                          | 5     |
|                              | 5b   | Describe eligibility criteria for participants.                                                                                                                                                       | 5     |
|                              | 5c   | Give details of treatments received, if relevant.                                                                                                                                                     | 5-6   |
| Outcome                      | 6a   | Clearly define the outcome that is predicted by the prediction model, including how and when assessed.                                                                                                | 6     |
|                              | 6b   | Report any actions to blind assessment of the outcome to be predicted.                                                                                                                                | 6     |
| Predictors                   | 7a   | Clearly define all predictors used in developing or validating the multivariable prediction model, including how and when they were measured.                                                         | 6     |
|                              | 7b   | Report any actions to blind assessment of predictors for the outcome and other predictors.                                                                                                            | 6     |
| Sample size                  | 8    | Explain how the study size was arrived at.                                                                                                                                                            | 5-6   |
| Missing data                 | 9    | Describe how missing data were handled (e.g., complete-case analysis, single imputation, multiple imputation) with details of any imputation method.                                                  | 5-6   |
| Statistical analysis methods | 10c  | For validation, describe how the predictions were calculated.                                                                                                                                         | 7     |
|                              | 10d  | Specify all measures used to assess model performance and, if relevant, to compare multiple models.                                                                                                   | 7     |
|                              | 10e  | Describe any model updating (e.g., recalibration) arising from the validation, if done.                                                                                                               | 7     |
| Risk groups                  | 11   | Provide details on how risk groups were created, if done.                                                                                                                                             | 6-7   |
| Development vs. validation   | 12   | For validation, identify any differences from the development data in setting, eligibility criteria, outcome, and predictors.                                                                         | 7     |
| <b>Results</b>               |      |                                                                                                                                                                                                       |       |
| Participants                 | 13a  | Describe the flow of participants through the study, including the number of participants with and without the outcome and, if applicable, a summary of the follow-up time. A diagram may be helpful. | 7-8   |
|                              | 13b  | Describe the characteristics of the participants (basic demographics, clinical features, available predictors), including the number of participants with missing data for predictors and outcome.    | 7-8   |
|                              | 13c  | For validation, show a comparison with the development data of the distribution of important variables (demographics, predictors and outcome).                                                        | 7-9   |
| Model performance            | 16   | Report performance measures (with CIs) for the prediction model.                                                                                                                                      | 8-9   |
| Model-updating               | 17   | If done, report the results from any model updating (i.e., model specification, model performance).                                                                                                   | 8-9   |
| <b>Discussion</b>            |      |                                                                                                                                                                                                       |       |
| Limitations                  | 18   | Discuss any limitations of the study (such as nonrepresentative sample, few events per predictor, missing data).                                                                                      | 11-12 |
| Interpretation               | 19a  | For validation, discuss the results with reference to performance in the development data, and any other validation data.                                                                             | 9-11  |
|                              | 19b  | Give an overall interpretation of the results, considering objectives, limitations, results from similar studies, and other relevant evidence.                                                        | 9-11  |
| Implications                 | 20   | Discuss the potential clinical use of the model and implications for future research.                                                                                                                 | 9-12  |
| <b>Other information</b>     |      |                                                                                                                                                                                                       |       |
| Supplementary information    | 21   | Provide information about the availability of supplementary resources, such as study protocol, Web calculator, and data sets.                                                                         | NA    |
| Funding                      | 22   | Give the source of funding and the role of the funders for the present study.                                                                                                                         | 14    |

We recommend using the TRIPOD Checklist in conjunction with the TRIPOD Explanation and Elaboration document.
