# Supplementary material for: GARFIELD-AF model for prediction of stroke and major bleeding in atrial fibrillation: a Danish nationwide validation study
Source: PubMed Central journal article supplement — BMJ Open. 2019 Nov 11;9(11):e033283. doi: 10.1136/bmjopen-2019-033283 (PMC6858250; doi:10.1136/bmjopen-2019-033283), 2019-11-11
Supplement: bmjopen-2019-033283supp001.pdf [file bmjopen-2019-033283supp001.pdf]

## SUPPLEMENTAL DATA FILE

Table S1. Equations of the risk scores

|                                                       |                                                                                                                                                                                                                                                                                                                             |
|-------------------------------------------------------|-----------------------------------------------------------------------------------------------------------------------------------------------------------------------------------------------------------------------------------------------------------------------------------------------------------------------------|
| GARFIELD-AF stroke/SE<br>(original)                   | $100 * (1 - (0.991344397^{**} (\exp(0.0304823 * (\text{Age} - 60) + 0.952524717 * \text{stroke/TIA/SE} + 0.432357326 * \text{Bleeding} + 0.319129628 * \text{Heart failure} + 0.574919171 * \text{Chronic kidney disease} + 0.654249546 * \text{other region} + 0.671380382 * \text{race} - 0.582045773 * \text{OAC}))))))$ |
| GARFIELD-AF stroke/SE<br>(modified for this analysis) | $100 * (1 - (0.991344397^{**} (\exp(0.0304823 * (\text{Age} - 60) + 0.952524717 * \text{stroke/TIA/SE} + 0.432357326 * \text{Bleeding} + 0.319129628 * \text{Heart failure} + 0.574919171 * \text{Chronic kidney disease} - 0.582045773 * \text{OAC}))))))$                                                                 |
| GARFIELD-AF major bleeding                            | $100 * (1 - (0.994488926^{**} (\exp(0.0389958 * (\text{AGE} - 60) + 0.515013074 * \text{vascular disease} + 0.577378429 * \text{Chronic kidney disease}))))))$                                                                                                                                                              |
| CHA <sub>2</sub> DS <sub>2</sub> -VASc                | 65 ≤ age < 75: 1 point<br>Age ≥ 75: 2 point<br>Female sex: 1 point<br>Heart failure: 1 point<br>Hypertension: 1 point<br>Ischemic stroke / TCI / Systemic embolism and thrombosis: 2 points<br>Ischemic Heart Disease or Peripheral atherosclerosis: 1 point<br>Diabetes: 1 point                                           |
| HAS-BLED                                              | Age > 65: 1 point<br>Hypertension: 1 point<br>Chronic kidney disease: 1 point<br>Liver disease: 1 point<br>Ischemic stroke / TCI / Systemic embolism and thrombosis: 1                                                                                                                                                      |

|  |                                                                                                            |
|--|------------------------------------------------------------------------------------------------------------|
|  | points<br>Bleeding: 1 point<br>ASA or ADP inhibitors or Dipyridamole or NSAID: 1 point<br>Alcohol: 1 point |
|--|------------------------------------------------------------------------------------------------------------|

**Table S2.** Definitions of covariates.

|                                                                                        | ICD-10 codes                                                                                                                                                                                                                                                                                                                                                                                                                                                                                       |
|----------------------------------------------------------------------------------------|----------------------------------------------------------------------------------------------------------------------------------------------------------------------------------------------------------------------------------------------------------------------------------------------------------------------------------------------------------------------------------------------------------------------------------------------------------------------------------------------------|
| Atrial Fibrillation                                                                    | I48                                                                                                                                                                                                                                                                                                                                                                                                                                                                                                |
| Non-Valvular Atrial Fibrillation                                                       | Presence of: I48<br>With absence of:<br>Rheumatic heart valve disease, prostatic heart valve                                                                                                                                                                                                                                                                                                                                                                                                       |
| Rheumatic heart valve disease                                                          | ICD10: Z952, Z954, I05, I06, I080A, I081A, I082A, I083A                                                                                                                                                                                                                                                                                                                                                                                                                                            |
| Prostatic heart valve                                                                  | KFKD, KFKH, KFMD, KFMH, KFGE, KFJF                                                                                                                                                                                                                                                                                                                                                                                                                                                                 |
| Stroke / TIA / Systemic embolism and thrombosis (without hemorrhagic stroke), baseline | Ischemic: I63, I64<br>TIA: G458, G459<br>Systemic embolism and thrombosis: I74                                                                                                                                                                                                                                                                                                                                                                                                                     |
| Stroke/SE, endpoint                                                                    | Ischemic: I63, I64<br>Systemic embolism and thrombosis: I74                                                                                                                                                                                                                                                                                                                                                                                                                                        |
| Hospitalization for any bleeding, baseline                                             | Heart: I312<br>Urine: N02, R31<br>Airways: R04<br>Eye: H313, H356, H431, H450, H052A<br>Gastrointestinal: K228F, K250, K252, K254, K256, K260, K262, K264, K266, K270, K272, K274, K276, K280, K282, K284, K286, K290, K298A, K625, K638B, K638C, K838F, K868G, K920, K921, K922, I850, I864A<br>Intra-dural bleeds not hemorrhagic stroke: S064, S065, S066<br>Hemorrhagic stroke: I60, I61, I62, I690, I691, I692<br>Retro-peritoneal: K661<br>Thorax: J942<br>Anemia due to bleeding: D500, D62 |
| Major bleeding (with hemorrhagic stroke)                                               | Heart: I312<br>Urine; N02, R31<br>Eye: H313, H356, H431, H450<br>Airways: R04<br>Gastrointestinal: K250, K252, K254, K256, K260, K262, K264, K266, K270, K272, K280, K282, K284, K286, K920, K921, K922<br>Intra-dural bleeds not hemorrhagic stroke: S064, S065, S066, I692<br>Hemorrhagic stroke: I60, I61, I62, I690, I691<br>Thorax: J942<br>Retro-peritoneal: K661                                                                                                                            |

|                                                                                                             |                                                                                                                                                                                                                                                                                                                                                                                     |
|-------------------------------------------------------------------------------------------------------------|-------------------------------------------------------------------------------------------------------------------------------------------------------------------------------------------------------------------------------------------------------------------------------------------------------------------------------------------------------------------------------------|
|                                                                                                             | Anemia due to bleeding: D62                                                                                                                                                                                                                                                                                                                                                         |
| Heart Failure                                                                                               | Cardiomyopathy: I42<br>Heart failure: I50, I110<br>Lung edema: J81                                                                                                                                                                                                                                                                                                                  |
| IHD                                                                                                         | Ischemic Heart Disease: I20-I25 <ul style="list-style-type: none"> <li>• Angina pectoris: I20</li> <li>• Acute myocardial infarction: I21, I22</li> <li>• Complications to AMI: I23,</li> <li>• Other forms of ischemic heart disease: I24, I25</li> </ul>                                                                                                                          |
| Peripheral artery disease                                                                                   | I70                                                                                                                                                                                                                                                                                                                                                                                 |
| Vascular disease                                                                                            | Presence of Ischemic heart disease or peripheral artery disease                                                                                                                                                                                                                                                                                                                     |
| Chronic Kidney Disease                                                                                      | N02, N03, N04, N05, N06, N07, N08, N11, N12, N14, N18, N19, N26, N158, N159, N160, N162, N163, N164, N168<br>Q61,<br>E102, E112, E132, E142,<br>I120,<br>M321B                                                                                                                                                                                                                      |
| Pulmonary embolism                                                                                          | I26                                                                                                                                                                                                                                                                                                                                                                                 |
| Alcohol                                                                                                     | F10, K70, E52, T51, K860, E244, G312, I426, O354, Z714, Z721, G621, G721, K292, L278A                                                                                                                                                                                                                                                                                               |
| Liver disease                                                                                               | B15, B16, B17, B18, B19, C22, K70, K71, K72, K73, K74, K75, K76, K77, Z944, I982, D684C                                                                                                                                                                                                                                                                                             |
| Diabetes Mellitus                                                                                           | Insulin: A10A<br>Non-Insulin: A10B                                                                                                                                                                                                                                                                                                                                                  |
| OAC                                                                                                         | VKA: Warfarin: B01AA03, Phenprocoumon: B01AA04<br>NOAC: Dabigatran: B01AE07, Rivaroxaban: B01AF01, Apixaban: B01AF02                                                                                                                                                                                                                                                                |
| Acetylsalicylic acid                                                                                        | B01AC06, N02BA01                                                                                                                                                                                                                                                                                                                                                                    |
| ADP-inhibitors                                                                                              | B01AC04, B01AC24, B10AC22                                                                                                                                                                                                                                                                                                                                                           |
| NSAID                                                                                                       | M01A without M01AX05                                                                                                                                                                                                                                                                                                                                                                |
| Hypertension as usage of combination of at least two of the seven different drugs classes at the same time. | <ol style="list-style-type: none"> <li>1. Non-Loop:<br/>Thiazides C02L, C02DA, C07B, C07D, C09XA52, C03A, C03EA;<br/>Low-ceiling diuretics (excl. thiazides): C03B, C03X, C07C, C08G, C09BA, C09DA; Potassium-sparing agents (spiron): C03D, C03E, C03EB</li> <li>2. Loop: High-ceiling diuretics (Loop) C03C, C03EB</li> <li>3. Antiadrenergic agents: C02A, C02B, C02C</li> </ol> |

|  |                                                                                                                                                                                                                                                                                |
|--|--------------------------------------------------------------------------------------------------------------------------------------------------------------------------------------------------------------------------------------------------------------------------------|
|  | <ol style="list-style-type: none"><li>4. Beta-blockers: C07A, C07B, C07C, C07D, C07F</li><li>5. Vasodilators: C02DB, C02DD, C02DG</li><li>6. Calcium channel blockers: C08, C09BB, C09DB</li><li>7. RASi: C09AA, C09BA, C09BB, C09CA, C09DA, C09DB, C09XA02, C09XA52</li></ol> |
|--|--------------------------------------------------------------------------------------------------------------------------------------------------------------------------------------------------------------------------------------------------------------------------------|

**Table S3.** Baseline characteristics for the Danish population, stratified by CHA<sub>2</sub>DS<sub>2</sub>VASC score. Low (0-1 men, 1-2 women) risk and high-risk.

|                                                      | Low risk       | High risk      |
|------------------------------------------------------|----------------|----------------|
| n                                                    | 20,673         | 70,020         |
| age (median [IQR])                                   | 61 [54, 68]    | 78 [71, 85]    |
| Sex, male (%)                                        | 13083 (63.3)   | 35403 (50.6)   |
| Diabetes (%)                                         | 286 (1.4)      | 10614 (15.2)   |
| Stroke/TIA (%)                                       | 0 (0.0)        | 12827 (18.3)   |
| Systemic embolism (%)                                | 0 (0.0)        | 448 (0.6)      |
| History of bleeding (%)                              | 1154 (5.6)     | 9176 (13.1)    |
| Chronic kidney disease (%)                           | 296 (1.4)      | 3928 (5.6)     |
| Heart failure (%)                                    | 225 (1.1)      | 14736 (21.0)   |
| Ischemic heart disease (%)                           | 492 (2.4)      | 12953 (18.5)   |
| OAC (%)                                              | 8801 (42.6)    | 42379 (60.5)   |
| NOAC (%)                                             | 4307 (20.8)    | 18905 (27.0)   |
| VKA (%)                                              | 4494 (21.7)    | 23474 (33.5)   |
| venous thromboembolism (%)                           | 380 (1.8)      | 2301 (3.3)     |
| Pulmonary embolism (%)                               | 0 (0.0)        | 2460 (3.5)     |
| Dipyridamole (%)                                     | 78 (0.4)       | 2629 (3.8)     |
| Hypertension (%)                                     | 3601 (17.4)    | 52064 (74.4)   |
| NSAID (%)                                            | 3113 (15.1)    | 9965 (14.2)    |
| Acetylsalicylic acid (%)                             | 3685 (17.8)    | 29205 (41.7)   |
| ADP-inhibitor (%)                                    | 335 (1.6)      | 8793 (12.6)    |
| PCI (%)                                              | 252 (1.2)      | 6104 (8.7)     |
| CABG (%)                                             | 109 (0.5)      | 3182 (4.5)     |
| CHA <sub>2</sub> DS <sub>2</sub> VASC (median [IQR]) | 1.0 [0.0, 1.0] | 4.0 [3.0, 5.0] |
| CHA <sub>2</sub> DS <sub>2</sub> VASC (%)            |                |                |
| 0                                                    | 5678 (27.5)    | -              |

|                                   |                   |                   |
|-----------------------------------|-------------------|-------------------|
| 1                                 | 10231 (49.5)      | -                 |
| 2                                 | 4764 (23.0)       | 11373 (16.2)      |
| 3                                 | -                 | 20143 (28.8)      |
| 4                                 | -                 | 19378 (27.7)      |
| 5                                 | -                 | 11020 (15.7)      |
| >5                                | -                 | 8106 (11.6)       |
| HAS-BLED (median [IQR])           | 1.0 [0.0, 1.0]    | 2.0 [2.0, 3.0]    |
| HAS-BLED category (%)             |                   |                   |
| 0                                 | 7844 (37.9)       | 453 (0.6)         |
| 1                                 | 9297 (45.0)       | 10659 (15.2)      |
| 2                                 | 3083 (14.9)       | 28087 (40.1)      |
| 3                                 | 400 (1.9)         | 24598 (35.1)      |
| >3                                | 49 (0.2)          | 6223 (8.9)        |
| GARFIELD-AF stroke (median [IQR]) | 0.68 [0.52, 0.94] | 1.33 [0.89, 2.09] |
| GARFIELD-AF, bleed (median [IQR]) | 0.59 [0.44, 0.76] | 1.27 [0.95, 1.69] |

Table S3 footnotes. Abbreviations. TIA; transient ischemic attack, SE; systemic embolism, OAC; oral anticoagulants, NOAC; non-vitamin-K antagonist, VKA; vitamin-K antagonist; NSAID; non-steroidal anti-inflammatory drug, ADP; adenosine diphosphate, PCI; Percutaneous coronary intervention, CABG; Coronary Artery Bypass Grafting.

**Table S4.** Logistic regression coefficients of GARFIELD-AF model for stroke/SE and major bleeding in the GARFIELD-AF Global cohort and the Danish AF cohort.

| Variable               | GARFIELD-AF Global registry | Danish AF cohort | P value* |
|------------------------|-----------------------------|------------------|----------|
| <b>Stroke/SE</b>       |                             |                  |          |
| Age                    | 0.030                       | 0.026            | <0.001   |
| Prior Stroke/SE        | 0.952                       | 1.572            | <0.001   |
| Bleeding               | 0.432                       | 0.191            | 0.001    |
| Heart failure          | 0.319                       | 0.065            | 0.269    |
| Chronic kidney disease | 0.574                       | 0.091            | 0.332    |
| OAC                    | -0.582                      | -0.396           | <0.001   |
| <b>Major bleeding</b>  |                             |                  |          |
| Age                    | 0.039                       | 0.041            | <0.001   |
| Vascular disease       | 0.515                       | 0.363            | <0.001   |
| Chronic kidney disease | 0.577                       | 0.865            | <0.001   |

Table S4 footnotes. Abbreviations. SE; systemic embolism, OAC; oral anticoagulant.

\* P value for coefficients in the Danish AF cohort



Figure S1. Flowchart of study population

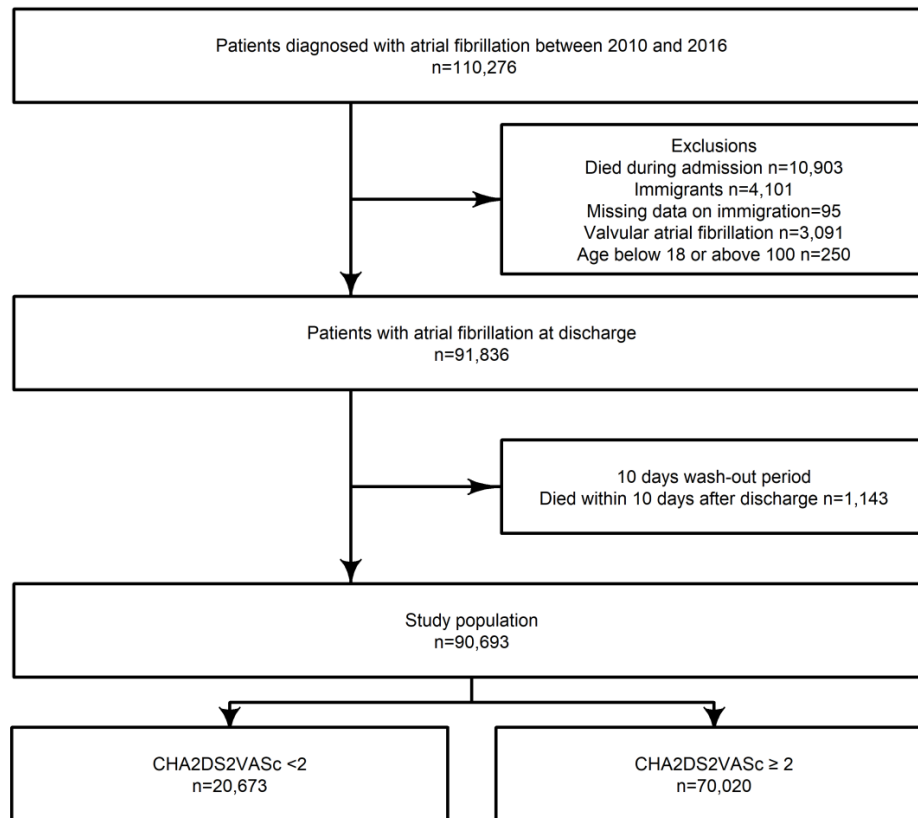

**Figure S2.** Cumulative incidence of ischemic stroke in the Danish population stratified by low and high stroke risk

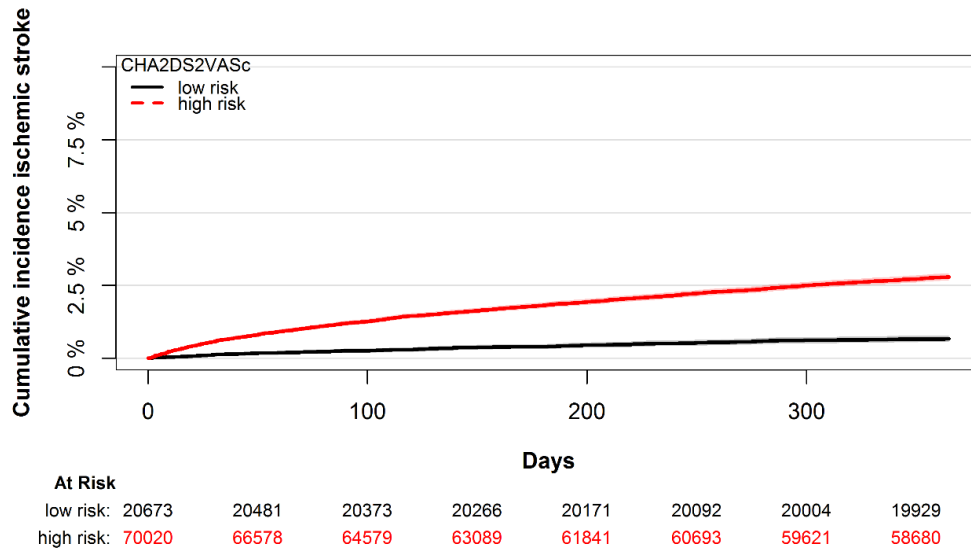

**Figure S2 legend.** Low risk patients were defined as CHA<sub>2</sub>DS<sub>2</sub>-VASc score ( $\leq 2$  for women, 0-1 for men and  $> 2$  for women and  $> 1$  for men).
